# Supplementary material
Source: publisher figshare collection journal article supplement (https://acs.figshare.com/ndownloader/files/24168524)
Supplement: Supplementary file 1 [file 24168524]

## Sheet: ReadMe
	DATABASE OVERVIEW (200 BINARY SYSTEMS)
	BAC=1 (26 binary systems)				BAC=2 (24 binary systems)				BAC=3 (20 binary systems)
	Component 1 (NA)	Component 2 (NA)	Sheet that contains the data		Component 1 (HA)	Component 2 (NA)	Sheet that contains the data		Component 1 (HD)	Component 2 (NA)	Sheet that contains the data
	METHANE	ETHANE	1_2		HYDROGEN SULFIDE	METHANE	1_1922		DIFLUOROMETHANE	PROPANE	1614_3
	METHANE	PROPANE	1_3		CARBON DIOXIDE	METHANE	1_909		TRIFLUOROMETHANE	ETHANE	1615_2
	METHANE	N-BUTANE	1_5		CARBON DIOXIDE	NITROGEN	905_909		TRIFLUOROMETHANE	CARBON TETRAFLUORIDE	1616_1615
	METHANE	N-HEXANE	1_11		CARBON DIOXIDE	ETHYLENE	201_909		DICHLOROMETHANE	ETHYLENE	201_1511
	METHANE	N-HEPTANE	1_17		CARBON DIOXIDE	ETHANE	909_2		DICHLOROMETHANE	n-PENTANE	1511_7
	METHANE	N-DECANE	1_56		CARBON DIOXIDE	PROPANE	909_3		DICHLOROMETHANE	CARBON TETRACHLORIDE	1511_1501
	METHANE	N-TETRACOSANE	1_77		CARBON DIOXIDE	N-BUTANE	909_5		CHLORODIFLUOROMETHANE	NITROGEN	905_1604
	NITROGEN	METHANE	905_1		CARBON DIOXIDE	CYCLOPENTANE	909_104		CHLORODIFLUOROMETHANE	PROPYLENE	202_1604
	NITROGEN	ETHANE	905_2		CARBON DIOXIDE	TOLUENE	909_502		CHLORODIFLUOROMETHANE	CARBON TETRAFLUORIDE	1616_1604
	NITROGEN	N-PENTANE	905_7		CARBON DIOXIDE	N-DECANE	909_56		CHLORODIFLUOROMETHANE	DICHLORODIFLUOROMETHANE	1604_1601
	NITROGEN	N-DECANE	905_56		CARBON DIOXIDE	N-DOTRIACONTANE	909_2082		1,1,1,2-TETRAFLUOROETHANE	ETHYL FLUORIDE	1617_2650
	ETHYLENE	XENON	201_959		ACETONE	N-PENTANE	7_1051		1,1,1,2-TETRAFLUOROETHANE	HEXAFLUOROETHANE	2693_2650
	ETHANE	PROPANE	2_3		ACETONE	BENZENE	1051_501		CHLOROFORM	BENZENE	1521_501
	ETHANE	N-HEPTANE	2_17		ACETONE	CYCLOHEXANE	1051_137		CHLOROFORM	n-HEXANE	1521_11
	ETHANE	N-HEXATRIACONTANE	2_2086		ACETONE	N-HEXANE	1051_11		CHLOROFORM	n-HEPTANE	1521_17
	ARGON	METHANE	914_1		METHYL ETHYL KETONE	BENZENE	1052_501		CHLOROFORM	1,2-DICHLOROETHANE	1521_1523
	PROPANE	ISOPENTANE	3_8		METHYL ETHYL KETONE	N-HEXANE	11_1052		CHLOROFORM	CARBON TETRACHLORIDE	1521_1501
	BENZENE	CYCLOHEXANE	501_137		METHYL TERT-BUTYL ETHER	TOLUENE	1405_502		2,3,3,3-TETRAFLUOROPROPENE	1,1,1-TRIFLUOROETHANE	1619_3608
	BENZENE	TOLUENE	501_502		METHYL TERT-BUTYL ETHER	N-HEPTANE	1405_17		PENTAFLUOROETHANE	PROPANE	1646_3
	BENZENE	N-HEPTANE	501_17		METHYL TERT-PENTYL ETHER	N-HEPTANE	1427_17		1,1,1,3,3-PENTAFLUOROBUTANE	DECAFLUOROBUTANE	1622_3606
	CYCLOHEXANE	METHYLCYCLOHEXANE	137_138		1,4-DIOXANE	CARBON TETRACHLORIDE	1501_1421
	CYCLOHEXANE	MONOCHLOROBENZENE	137_1571		ETHYL ACETATE	TOLUENE	1313_502
	N-HEXANE	CYCLOHEXANE	11_137		N-METHYL-2-PYRROLIDONE	BENZENE	501_1071
	1,2-DICHLOROETHANE	TOLUENE	1523_502		QUINOLINE	1,2,3,4-TETRAHYDRONAPHTALENE	706_1748
	1,2-DICHLOROETHANE	CARBON TETRACHLORIDE	1523_1501
	N-HEPTANE	MONOCHLOROBENZENE	17_1571
	BAC=4 (22 binary systems)				BAC=5 (18 binary systems)				BAC=6 (25 binary systems)
	Component 1 (HA) or Component 1 (HD)	Component 2 (HA) or Component 2 (HD)	Sheet that contains the data		Component 1 (SA)	Component 2 (NA)	Sheet that contains the data		Component 1 (HD)	Component 2 (HA)	Sheet that contains the data
	CARBON MONOXIDE	CARBON DIOXIDE	908_909		AMMONIA	NITROGEN	905_1911		DIFLUOROMETHANE	CARBON DIOXIDE	909_1614
	OXYGEN	CARBON DIOXIDE	901_909		WATER	NITROGEN	905_1921		DIFLUOROMETHANE	SULFUR DIOXIDE	1614_910
	CARBON DIOXIDE	HYDROGEN SULFIDE	909_1922		WATER	ETHANE	2_1921		DIFLUOROMETHANE	DIMETHYL ETHER	1614_1401
	CARBON DIOXIDE	DIMETHYL ETHER	909_1401		WATER	n-BUTANE	5_1921		TRIFLUOROMETHANE	CARBON DISULFIDE	1615_1938
	CARBON DIOXIDE	CARBON DISULFIDE	909_1938		WATER	BENZENE	1921_501		1,1,1-TRIFLUOROETHANE	DIMETHYL ETHER	1619_1401
	CARBON DIOXIDE	ETHYL ACETATE	909_1313		METHANOL	ETHANE	2_1101		DICHLOROMETHANE	CARBON DISULFIDE	1511_1938
	CARBON DIOXIDE	DIMETHYL CARBONATE	909_2391		METHANOL	PROPANE	3_1101		CHLORODIFLUOROMETHANE	CARBON DIOXIDE	909_1604
	DIMETHYL ETHER	SULFUR DIOXIDE	1401_910		METHANOL	BENZENE	1101_501		CHLORODIFLUOROMETHANE	CARBON DISULFIDE	1604_1938
	DIFLUOROMETHANE	1,1,1,2-TETRAFLUOROETHANE	1614_2650		METHANOL	n-HEXANE	1101_11		CHLORODIFLUOROMETHANE	DIMETHYL ETHER	1604_1401
	TRIFLUOROMETHANE	CHLORODIFLUOROMETHANE	1615_1604		ETHANOL	BENZENE	1102_501		1,1,1,2-TETRAFLUOROETHANE	CARBON DIOXIDE	909_2650
	1,2-EPOXYBUTANE	DIMETHYL CARBONATE	1471_2391		ETHANOL	n-HEPTANE	1102_17		CHLOROFORM	ACETONE	1051_1521
	TETRAHYDROFURAN	N,N-DIMETHYLFORMAMIDE	1479_1876		1-PROPANOL	ETHANE	2_1103		CHLOROFORM	TETRAHYDROFURAN	1521_1479
	DIETHYL ETHER	ACETONE	1402_1051		1-PROPANOL	BENZENE	1103_501		CHLOROFORM	METHYL ACETATE	1312_1521
	CARBON DISULFIDE	ACETONE	1938_1051		1-PROPANOL	n-HEXANE	11_1103		CHLOROFORM	ETHYL ACETATE	1521_1313
	THIOPHENE	SULFOLANE	1821_1845		ISOPROPANOL	2,2,4-TRIMETHYLPENTANE	1104_41		CHLOROFORM	DI-n-PROPYL ETHER	1521_1446
	CHLORODIFLUOROMETHANE	1,1,1,2-TETRAFLUOROETHANE	1604_2650		DIETHYLAMINE	BENZENE	1710_501		CHLOROFORM	DIISOPROPYL ETHER	1521_1403
	ETHYL ACETATE	1,4-DIOXANE	1313_1421		DIETHYLAMINE	MONOCHLOROBENZENE	1710_1571		CHLOROFORM	n-BUTYL ETHYL ETHER	1521_1448
	DIMETHYL CARBONATE	DIETHYL CARBONATE	2391_1392		2-BUTANOL	CYCLOHEXANE	1107_137		PENTAFLUOROETHANE	DIMETHYL ETHER	1646_1401
	TRIETHYLAMINE	1,4-DIOXANE	1706_1421						TRICHLOROETHYLENE	ETHYL ACETATE	1313_1541
	1,1,1,2-TETRAFLUOROETHANE	1,1-DIFLUOROETHANE	2650_1640						1,1,1,3,3,3-HEXAFLUOROPROPANE	DIMETHYL ETHER	1401_1620
	n-BUTYL ACETATE	N,N-DIMETHYLFORMAMIDE	1315_1876						1,1,2,2-TETRACHLOROETHANE	3-PENTANONE	1053_1529
	PENTAFLUOROETHANE	1,1,1,2-TETRAFLUOROETHANE	1646_2650						1,1,2,2-TETRACHLOROETHANE	CYCLOPENTANONE	1079_1529
									1,1,2,2-TETRACHLOROETHANE	ETHYL ACETATE	1313_1529
									1,1,1,2,3,3,3-HEPTAFLUOROPROPANE	CARBON DIOXIDE	909_2630
									1,1,1,2,3,3,3-HEPTAFLUOROPROPANE	SULFUR DIOXIDE	2630_910
	BAC=7 (16 binary systems)				BAC=8 (26 binary systems)				BAC=9 (23 binary systems)
	Component 1 (SA)	Component 2 (HD)	Sheet that contains the data		Component 1 (SA)	Component 2 (HA)	Sheet that contains the data		Component 1 (SA)	Component 2 (SA)	Sheet that contains the data
	METHANOL	HALOTHANE	1101_2640		WATER	CARBON DIOXIDE	909_1921		AMMONIA	WATER	1911_1921
	ACETONITRILE	1-HEXYNE	413_1772		WATER	DIMETHYL ETHER	1401_1921		AMMONIA	ACETONIRTILE	1911_1772
	ACETONITRILE	CHLOROFORM	1521_1772		WATER	ACETONE	1051_1921		WATER	ACETONITRILE	1921_1772
	ETHANOL	1-HEPTYNE	1102_2414		METHANOL	CARBON MONOXIDE	908_1101		WATER	ALLYL ALCOHOL	1921_1167
	ETHANOL	CHOLOROFORM	1102_1521		METHANOL	CARBON DIOXIDE	909_1101		WATER	ETHYLENEDIAMINE	1921_1741
	ACETIC ACID	CHLOROFORM	1521_1252		METHANOL	ACETONE	1101_1051		WATER	1-PENTANOL	1921_1109
	ISOPROPANOL	CHLOROFORM	1104_1521		METHANOL	THIOPHENE	1101_1821		WATER	PROPYLENE GLYCOL MONOMETHYL ETHER	1921_3854
	ISOPROPANOL	TRICHLOROETHYLENE	1104_1541		METHANOL	1,4-DIOXANE	1101_1421		WATER	PHENOL	1921_1181
	1-PROPANOL	TRICHOLOROETHYLENE	1103_1541		METHANOL	ETHYL ACETATE	1101_1313		WATER	2-BUTOXYETHANOL	1921_2862
	1-PROPANOL	CHLOROFORM	1521_1103		METHANOL	METHYL tert-BUTYL ETHER	1101_1405		METHANOL	WATER	1101_1921
	ETHYL FORMATE	CHLOROFORM	1302_1521		METHANOL	DIISOPROPYL ETHER	1101_1403		METHANOL	ETHANOL	1101_1102
	1-BUTANOL	CHLOROFORM	1521_1105		METHANOL	n-BUTYL ACETATE	1101_1315		METHANOL	1-PROPANOL	1101_1103
	1-BUTANOL	TRICHLOROETHYLENE	1541_1105		ACETONITRILE	1,4-DIOXANE	1772_1421		METHANOL	1-BUTANOL	1101_1105
	2-BUTANOL	TRICHLOROETHYLENE	1107_1541		ETHANOL	CARBON DIOXIDE	909_1102		METHANOL	3-METHYL-1-BUTANOL	1101_1123
	2-METHOXYETHANOL	TRICHLOROETHYLENE	1541_2860		ETHANOL	ACETONE	1102_1051		ETHANOL	WATER	1102_1921
	n-PROPYL FORMATE	1,1,2,2-TETRACHLOROETHANE	1303_1529		ETHANOL	METHYL ETHYL KETONE	1102_1052		ETHANOL	ACETIC ACID	1102_1252
					ETHANOL	DIETHYL ETHER	1402_1102		ETHANOL	ETHYL FORMATE	1102_1302
					ETHANOL	ETHYL ACETATE	1102_1313		ETHANOL	3-METHYL-1-BUTANOL	1102_1123
					ETHANOL	METHYL tert-BUTYL ETHER	1102_1405		METHYL FORMATE	METHANOL	1301_1101
					ETHANOL	DI-n-BUTYL ETHER	1102_1404		ISOPROPANOL	WATER	1104_1921
					ISOPROPANOL	DIISOPROPYL ETHER	1104_1403		2-METHYL-2-PROPANOL	1-BUTANOL	1108_1105
					DIETHYLAMINE	ETHYL ACETATE	1710_1313		NITROMETHANE	1-BUTANOL	1760_1105
					DIETHYLAMINE	TRIETHYLAMINE	1710_1706		ETHYL FORMATE	WATER	1302_1921
					2-METHYL-1-PROPANOL	CARBON DIOXIDE	909_1106
					2-METHYL-2-PROPANOL	METHYL tert-BUTYL ETHER	1405_1108
					1-PENTANOL	CARBON DIOXIDE	909_1109

## Sheet: 1_909
Name	METHANE		CARBON DIOXIDE
CAS	74-82-8		124-38-9
Critical temperature / K	190.564		304.21
Critical pressure / bar	45.99		73.83
Acentric factor	0.012		0.224
	Source: DIPPR May 2017
Phase equilibrium data
Isothermal phase equilibrium data
Mraw, Stephen C. - Hwang, Shuen-Cheng - Kobayashi, Riki, Vapor-liquid equilibrium of the methane-carbon dioxide system at low temperatures, Journal of Chemical & Engineering Data. 23 (1978) 135-139.
https://doi.org/10.1021/je60077a014
T / K =	173.15				Chart (double-click image to zoom in)
P / bar	x₁	y₁
24.663	0.9507	0.9896
24.821	0.9563	0.9908
25.166	0.9686	0.9934
25.511	0.9809	0.996
Mraw, Stephen C. - Hwang, Shuen-Cheng - Kobayashi, Riki, Vapor-liquid equilibrium of the methane-carbon dioxide system at low temperatures, Journal of Chemical & Engineering Data. 23 (1978) 135-139.
https://doi.org/10.1021/je60077a014
T / K =	183.15				Chart (double-click image to zoom in)
P / bar	x₁	y₁
33.598	0.935	0.977
33.784	0.9393	0.9785
34.474	0.9553	0.9842
35.163	0.9712	0.9898
35.853	0.9872	0.9955
Mraw, Stephen C. - Hwang, Shuen-Cheng - Kobayashi, Riki, Vapor-liquid equilibrium of the methane-carbon dioxide system at low temperatures, Journal of Chemical & Engineering Data. 23 (1978) 135-139.
https://doi.org/10.1021/je60077a014
T / K =	193.15				Chart (double-click image to zoom in)
P / bar	x₁	y₁
42.885	0.8853	0.9473
43.437	0.8992	0.9507
44.126	0.9136	0.9554
44.816	0.9272	0.9591
45.505	0.9385	0.9635
46.195	0.9517	0.9677
46.884	0.9622	0.9718
Mraw, Stephen C. - Hwang, Shuen-Cheng - Kobayashi, Riki, Vapor-liquid equilibrium of the methane-carbon dioxide system at low temperatures, Journal of Chemical & Engineering Data. 23 (1978) 135-139.
https://doi.org/10.1021/je60077a014
T / K =	203.15				Chart (double-click image to zoom in)
P / bar	x₁	y₁
48.263	0.7307	0.8914
48.953	0.7491	0.8952
49.642	0.7683	0.8962
50.332	0.7879	0.8973
51.021	0.8051	0.8976
51.711	0.8229	0.8978
52.4	0.8388	0.8967
53.09	0.8568	0.8933
53.365	0.8784	0.8784	CRIT
Mraw, Stephen C. - Hwang, Shuen-Cheng - Kobayashi, Riki, Vapor-liquid equilibrium of the methane-carbon dioxide system at low temperatures, Journal of Chemical & Engineering Data. 23 (1978) 135-139.
https://doi.org/10.1021/je60077a014
T / K =	210.15				Chart (double-click image to zoom in)
P / bar	x₁	y₁
42.196	0.3062	0.8482
43.092	0.3175	0.8568
44.816	0.3604	0.8587
46.54	0.4056	0.8596
48.263	0.4555	0.8602
49.987	0.5205	0.8609
51.711	0.5881	0.861
53.434	0.6486	0.8608
55.158	0.7018	0.8587
56.882	0.7544	0.8539
Al-Sahhaf, Taher A. - Kidnay, Arthur J. - Sloan, E. Dendy, Liquid + vapor equilibriums in the nitrogen + carbon dioxide + methane system, Industrial & Engineering Chemistry Fundamentals. 22 (1983) 372-380.
https://doi.org/10.1021/i100012a004
T / K =	219.26				Chart (double-click image to zoom in)
P / bar	x₁	y₁
13.98	0.0339	0.5457
19	0.0579	0.6493
24.32	0.0859	0.71
31.2	0.1308	0.759
38.61	0.1923	0.789
Mraw, Stephen C. - Hwang, Shuen-Cheng - Kobayashi, Riki, Vapor-liquid equilibrium of the methane-carbon dioxide system at low temperatures, Journal of Chemical & Engineering Data. 23 (1978) 135-139.
https://doi.org/10.1021/je60077a014
T / K =	219.26				Chart (double-click image to zoom in)
P / bar	x₁	y₁
6.8948	0.0049	0.186
13.79	0.0355	0.5461
20.684	0.0681	0.6745
27.579	0.1054	0.7384
34.474	0.1535	0.774
41.369	0.218	0.796
48.263	0.3056	0.8078
55.158	0.4368	0.8115
62.053	0.6204	0.8027
63.432	0.662	0.7948
Wei, Michael S.-W. - Brown, Trent S. - Kidnay, Arthur J. - Sloan, E. Dendy, Vapor + Liquid Equilibria for the Ternary System Methane + Ethane + Carbon Dioxide at 230 K and Its Constituent Binaries at Temperatures from 207 to 270 K, Journal of Chemical & Engineering Data. 40 (1995) 726-731.
https://doi.org/10.1021/je00020a002
T / K =	230				Chart (double-click image to zoom in)
P / bar	x₁	y₁
10.78	0.007	0.1553
11.5	0.0209	0.1941
14.53	0.0221	0.348
15.2	0.0282	0.3766
17.86	0.0365	0.455
20.92	0.0503	0.5218
25.3	0.0719	0.5851
25.51	0.073	0.5929
29.16	0.092	0.632
35.03	0.1269	0.677
35.5	0.1302	0.6792
39.68	0.1577	0.7005
45.6	0.2037	0.72
45.65	0.2042	0.7237
51.16	0.256	0.7368
55.7	0.3018	0.7393
56.4	0.3171	0.7449
58.55	0.3416	0.7466
60.86	0.3805	0.7461
63.53	0.4187	0.7448
64.9	0.4362	0.7381
65.86	0.4523	0.7411
65.9	0.4511	0.7423
66.63	0.4762	0.7369
67.36	0.4952	0.7338
69.01	0.5407	0.7247
69.91	0.5814	0.7004
Webster, Leigh A. - Kidnay, Arthur J., Vapor−Liquid Equilibria for the Methane−Propane−Carbon Dioxide Systems at 230 K and 270 K, Journal of Chemical & Engineering Data. 46 (2001) 759-764.
https://doi.org/10.1021/je000307d
T / K =	230				Chart (double-click image to zoom in)
P / bar	x₁	y₁
14.2	0.0213	0.3385
16.51	0.0307	0.4196
19.31	0.0441	0.49
22.57	0.0597	0.5512
24.88	0.0714	0.5851
33.75	0.1199	0.667
40.03	0.1617	0.7012
44.97	0.1994	0.7199
55.73	0.3093	0.7432
58.36	0.3404	0.7454
62.41	0.401	0.7443
64.17	0.4323	0.7442
65.12	0.453	0.7422
66.54	0.4815	0.7382
66.49	0.4862	0.7371
69.12	0.5302	0.7286
69.7	0.5393	0.7245
70	0.548	0.7217
70.04	0.5521	0.7222
70.72	0.5682	0.7156
71.12	0.5774	0.7102
71.45	0.5888	0.7066
Al-Sahhaf, Taher A. - Kidnay, Arthur J. - Sloan, E. Dendy, Liquid + vapor equilibriums in the nitrogen + carbon dioxide + methane system, Industrial & Engineering Chemistry Fundamentals. 22 (1983) 372-380.
https://doi.org/10.1021/i100012a004
T / K =	240				Chart (double-click image to zoom in)
P / bar	x₁	y₁
21.04	0.0328	0.348
30.59	0.0761	0.516
40.89	0.1315	0.605
51.98	0.2074	0.655
61.2	0.2873	0.6742
66.57	0.3475	0.6771
70.73	0.4016	0.6728
72.65	0.4315	0.6672
73.97	0.4525	0.6624
75.94	0.4914	0.6473
76.6	0.5048	0.6388
77.72	0.5475	0.6199
Wei, Michael S.-W. - Brown, Trent S. - Kidnay, Arthur J. - Sloan, E. Dendy, Vapor + Liquid Equilibria for the Ternary System Methane + Ethane + Carbon Dioxide at 230 K and Its Constituent Binaries at Temperatures from 207 to 270 K, Journal of Chemical & Engineering Data. 40 (1995) 726-731.
https://doi.org/10.1021/je00020a002
T / K =	250				Chart (double-click image to zoom in)
P / bar	x₁	y₁
19.67	0.0065	0.0782
20.71	0.0106	0.1174
23.15	0.0201	0.1952
24.88	0.0269	0.2408
27.59	0.0379	0.3001
29.64	0.0465	0.3381
31.31	0.0536	0.3655
34.46	0.0676	0.409
38.36	0.0863	0.4533
42	0.1041	0.4855
47.92	0.1368	0.5262
53.78	0.1715	0.5559
61.5	0.2246	0.5812
67.15	0.2711	0.5914
73.99	0.3366	0.5856
76.84	0.3718	0.5761
79.83	0.4163	0.5523
80.53	0.4252	0.5408
Wei, Michael S.-W. - Brown, Trent S. - Kidnay, Arthur J. - Sloan, E. Dendy, Vapor + Liquid Equilibria for the Ternary System Methane + Ethane + Carbon Dioxide at 230 K and Its Constituent Binaries at Temperatures from 207 to 270 K, Journal of Chemical & Engineering Data. 40 (1995) 726-731.
https://doi.org/10.1021/je00020a002
T / K =	270				Chart (double-click image to zoom in)
P / bar	x₁	y₁
35.58	0.0151	0.0766
36.73	0.0198	0.1047
38.83	0.0305	0.1461
41.46	0.0377	0.1778
45.06	0.0504	0.2203
49.15	0.0724	0.2661
58.51	0.1154	0.3372
70.93	0.1834	0.3942
78.68	0.2407	0.4061
81.97	0.2696	0.3952
82.82	0.2803	0.3887
83.81	0.2995	0.3782
Webster, Leigh A. - Kidnay, Arthur J., Vapor−Liquid Equilibria for the Methane−Propane−Carbon Dioxide Systems at 230 K and 270 K, Journal of Chemical & Engineering Data. 46 (2001) 759-764.
https://doi.org/10.1021/je000307d
T / K =	270				Chart (double-click image to zoom in)
P / bar	x₁	y₁
38.83	0.0264	0.1352
39.13	0.0276	0.1402
41.04	0.0342	0.168
44.13	0.0477	0.2093
47.87	0.064	0.2517
49.87	0.0723	0.2706
54.33	0.0919	0.3085
55.03	0.0948	0.3128
65.37	0.1479	0.3702
69.59	0.1739	0.3847
73.05	0.1949	0.3945
79.46	0.2435	0.3977
80.03	0.249	0.3974
81.31	0.2602	0.3934
82.07	0.2688	0.3894
83.89	0.2901	0.3762
84.19	0.2991	0.3704
Al-Sahhaf, Taher A. - Kidnay, Arthur J. - Sloan, E. Dendy, Liquid + vapor equilibriums in the nitrogen + carbon dioxide + methane system, Industrial & Engineering Chemistry Fundamentals. 22 (1983) 372-380.
https://doi.org/10.1021/i100012a004
T / K =	270				Chart (double-click image to zoom in)
P / bar	x₁	y₁
36.73	0.0183	0.1048
38.1	0.0235	0.1273
43.87	0.0457	0.2086
51.83	0.0793	0.2885
59.43	0.1167	0.3451
61.56	0.1261	0.3543
70.83	0.1785	0.3901
79.69	0.2463	0.398
82.23	0.2737	0.3916
84.15	0.306	0.3742
Somait, Fahad A. - Kidnay, Arthur J., Liquid-vapor equilibriums at 270.00 K for systems containing nitrogen, methane, and carbon dioxide, Journal of Chemical & Engineering Data. 23 (1978) 301-305.
https://doi.org/10.1021/je60079a019
T / K =	270				Chart (double-click image to zoom in)
P / bar	x₁	y₁
38.352	0.0237	0.1269
43.924	0.0455	0.2082
45.596	0.0538	0.23
48.788	0.0666	0.2629
52.689	0.0838	0.2962
60.795	0.1226	0.3519
60.795	0.1226	0.3519
66.267	0.1533	0.3774
77.007	0.2224	0.4006
82.479	0.274	0.3895
84.322	0.306	0.3726
Xu, Nanping - Dong, Junhang - Wang, Yanru - Shi, Jun, High pressure vapor liquid equilibria at 293 K for systems containing nitrogen, methane and carbon dioxide, Fluid Phase Equilibria. 81 (1992) 175-186.
https://doi.org/10.1016/0378-3812(92)85150-7
T / K =	288.5				Chart (double-click image to zoom in)
P / bar	x₁	y₁
55.9	0.015	0.052
62.1	0.042	0.108
71.1	0.086	0.167
75.1	0.112	0.185
78.2	0.128	0.195
78.7	0.129	0.194
81.5	0.175	0.175	CRIT
Xu, N. - Dong, J. - Wang, Y. - Shi, J., Vapor Liquid Equilibria For N2-CH4-CO2 System Near Critical Region, Huagong Xuebao. 43 (1992) 640-644.
T / K =	298.36				Chart (double-click image to zoom in)
P / bar	x₁	y₁
72.9	0.03	0.056
75	0.042	0.066
76.8	0.052	0.072
77.4	0.058	0.071
77.8	0.067	0.067	CRIT
Property change of mixing data
Enthalpy of mixing
Lee, J. I. - Mather, A. E., The excess enthalpy of gaseous mixtures of carbon dioxide with methane, The Canadian Journal of Chemical Engineering. 50 (1972) 95-100.
https://doi.org/10.1002/cjce.5450500117
T / K =	283.15				Chart (double-click image to zoom in)
P / bar =	10.133
hᴹ / J.mol⁻¹	z₁
17	0.1
29	0.2
46	0.4
47	0.5
40	0.6
32	0.7
24	0.8
13	0.9
Barry, Alpha O. - Kaliaguine, Serge C. - Ramalho, Rubens S., Direct determination of enthalpy of mixing for the binary gaseous system methane-carbon dioxide by an isothermal flow calorimeter, Journal of Chemical & Engineering Data. 27 (1982) 258-264.
https://doi.org/10.1021/je00029a010
T / K =	293.15				Chart (double-click image to zoom in)
P / bar =	5.07
hᴹ / J.mol⁻¹	z₁
17.9	0.253
25.63	0.477
26.39	0.501
18.45	0.816
Lee, J. I. - Mather, A. E., The excess enthalpy of gaseous mixtures of carbon dioxide with methane, The Canadian Journal of Chemical Engineering. 50 (1972) 95-100.
https://doi.org/10.1002/cjce.5450500117
T / K =	293.15				Chart (double-click image to zoom in)
P / bar =	30.398
hᴹ / J.mol⁻¹	z₁
80	0.1
134	0.2
180	0.4
177	0.5
165	0.6
143	0.7
102	0.8
56	0.9
Barry, Alpha O. - Kaliaguine, Serge C. - Ramalho, Rubens S., Direct determination of enthalpy of mixing for the binary gaseous system methane-carbon dioxide by an isothermal flow calorimeter, Journal of Chemical & Engineering Data. 27 (1982) 258-264.
https://doi.org/10.1021/je00029a010
T / K =	305.15				Chart (double-click image to zoom in)
P / bar =	15.2
hᴹ / J.mol⁻¹	z₁
38.85	0.181
57.82	0.443
50.23	0.689
31.01	0.843
Lee, J. I. - Mather, A. E., The excess enthalpy of gaseous mixtures of carbon dioxide with methane, The Canadian Journal of Chemical Engineering. 50 (1972) 95-100.
https://doi.org/10.1002/cjce.5450500117
T / K =	305.15				Chart (double-click image to zoom in)
P / bar =	40.53
hᴹ / J.mol⁻¹	z₁
105	0.1
162	0.2
223	0.4
224	0.5
208	0.6
175	0.7
130	0.8
71	0.9
Lee, J. I. - Mather, A. E., The excess enthalpy of gaseous mixtures of carbon dioxide with methane, The Canadian Journal of Chemical Engineering. 50 (1972) 95-100.
https://doi.org/10.1002/cjce.5450500117
T / K =	305.15				Chart (double-click image to zoom in)
P / bar =	81.06
hᴹ / J.mol⁻¹	z₁
3600	0.1
3990	0.2
3500	0.4
3040	0.5
2540	0.6
1915	0.7
1330	0.8
691	0.9
Barry, Alpha O. - Kaliaguine, Serge C. - Ramalho, Rubens S., Direct determination of enthalpy of mixing for the binary gaseous system methane-carbon dioxide by an isothermal flow calorimeter, Journal of Chemical & Engineering Data. 27 (1982) 258-264.
https://doi.org/10.1021/je00029a010
T / K =	313.15				Chart (double-click image to zoom in)
P / bar =	5.07
hᴹ / J.mol⁻¹	z₁
11.17	0.252
18.51	0.456
14.6	0.644
9.881	0.77
Barry, Alpha O. - Kaliaguine, Serge C. - Ramalho, Rubens S., Direct determination of enthalpy of mixing for the binary gaseous system methane-carbon dioxide by an isothermal flow calorimeter, Journal of Chemical & Engineering Data. 27 (1982) 258-264.
https://doi.org/10.1021/je00029a010
T / K =	313.15				Chart (double-click image to zoom in)
P / bar =	46
hᴹ / J.mol⁻¹	z₁
137.5	0.158
220	0.351
226.88	0.514
193.13	0.686
145.05	0.782
Lee, J. I. - Mather, A. E., The excess enthalpy of gaseous mixtures of carbon dioxide with methane, The Canadian Journal of Chemical Engineering. 50 (1972) 95-100.
https://doi.org/10.1002/cjce.5450500117
T / K =	313.15				Chart (double-click image to zoom in)
P / bar =	40.53
hᴹ / J.mol⁻¹	z₁
80	0.1
128	0.2
180	0.4
180	0.5
165	0.6
141	0.7
103	0.8
55	0.9
Lee, J. I. - Mather, A. E., The excess enthalpy of gaseous mixtures of carbon dioxide with methane, The Canadian Journal of Chemical Engineering. 50 (1972) 95-100.
https://doi.org/10.1002/cjce.5450500117
T / K =	313.15				Chart (double-click image to zoom in)
P / bar =	81.06
hᴹ / J.mol⁻¹	z₁
878	0.1
1210	0.2
1243	0.4
1168	0.5
998	0.6
800	0.7
577	0.8
298	0.9
Lee, J. I. - Mather, A. E., The excess enthalpy of gaseous mixtures of carbon dioxide with methane, The Canadian Journal of Chemical Engineering. 50 (1972) 95-100.
https://doi.org/10.1002/cjce.5450500117
T / K =	323.15				Chart (double-click image to zoom in)
P / bar =	10.133
hᴹ / J.mol⁻¹	z₁
9	0.1
18	0.2
30	0.4
31	0.5
29	0.6
24	0.7
17	0.8
8	0.9
Lee, J. I. - Mather, A. E., The excess enthalpy of gaseous mixtures of carbon dioxide with methane, The Canadian Journal of Chemical Engineering. 50 (1972) 95-100.
https://doi.org/10.1002/cjce.5450500117
T / K =	323.15				Chart (double-click image to zoom in)
P / bar =	50.663
hᴹ / J.mol⁻¹	z₁
90	0.1
165	0.2
245	0.4
245	0.5
220	0.6
187	0.7
135	0.8
78	0.9
Lee, J. I. - Mather, A. E., The excess enthalpy of gaseous mixtures of carbon dioxide with methane, The Canadian Journal of Chemical Engineering. 50 (1972) 95-100.
https://doi.org/10.1002/cjce.5450500117
T / K =	323.15				Chart (double-click image to zoom in)
P / bar =	91.192
hᴹ / J.mol⁻¹	z₁
570	0.1
850	0.2
1040	0.4
1000	0.5
900	0.6
740	0.7
550	0.8
305	0.9
Lee, J. I. - Mather, A. E., The excess enthalpy of gaseous mixtures of carbon dioxide with methane, The Canadian Journal of Chemical Engineering. 50 (1972) 95-100.
https://doi.org/10.1002/cjce.5450500117
T / K =	333.15				Chart (double-click image to zoom in)
P / bar =	30.398
hᴹ / J.mol⁻¹	z₁
32	0.1
55	0.2
90	0.4
97	0.5
90	0.6
77	0.7
55	0.8
30	0.9
Lee, J. I. - Mather, A. E., The excess enthalpy of gaseous mixtures of carbon dioxide with methane, The Canadian Journal of Chemical Engineering. 50 (1972) 95-100.
https://doi.org/10.1002/cjce.5450500117
T / K =	333.15				Chart (double-click image to zoom in)
P / bar =	70.927
hᴹ / J.mol⁻¹	z₁
185	0.1
300	0.2
387	0.4
376	0.5
335	0.6
282	0.7
215	0.8
114	0.9
Lee, J. I. - Mather, A. E., The excess enthalpy of gaseous mixtures of carbon dioxide with methane, The Canadian Journal of Chemical Engineering. 50 (1972) 95-100.
https://doi.org/10.1002/cjce.5450500117
T / K =	343.15				Chart (double-click image to zoom in)
P / bar =	10.133
hᴹ / J.mol⁻¹	z₁
7	0.1
16	0.2
22	0.4
24	0.5
22	0.6
19	0.7
15	0.8
6	0.9
Lee, J. I. - Mather, A. E., The excess enthalpy of gaseous mixtures of carbon dioxide with methane, The Canadian Journal of Chemical Engineering. 50 (1972) 95-100.
https://doi.org/10.1002/cjce.5450500117
T / K =	343.15				Chart (double-click image to zoom in)
P / bar =	50.663
hᴹ / J.mol⁻¹	z₁
70	0.1
120	0.2
163	0.4
165	0.5
153	0.6
130	0.7
96	0.8
53	0.9
Lee, J. I. - Mather, A. E., The excess enthalpy of gaseous mixtures of carbon dioxide with methane, The Canadian Journal of Chemical Engineering. 50 (1972) 95-100.
https://doi.org/10.1002/cjce.5450500117
T / K =	343.15				Chart (double-click image to zoom in)
P / bar =	91.192
hᴹ / J.mol⁻¹	z₁
235	0.1
410	0.2
520	0.4
510	0.5
470	0.6
395	0.7
285	0.8
155	0.9
Lee, J. I. - Mather, A. E., The excess enthalpy of gaseous mixtures of carbon dioxide with methane, The Canadian Journal of Chemical Engineering. 50 (1972) 95-100.
https://doi.org/10.1002/cjce.5450500117
T / K =	353.15				Chart (double-click image to zoom in)
P / bar =	30.398
hᴹ / J.mol⁻¹	z₁
28	0.1
48	0.2
73	0.4
76	0.5
70	0.6
58	0.7
46	0.8
26	0.9
Lee, J. I. - Mather, A. E., The excess enthalpy of gaseous mixtures of carbon dioxide with methane, The Canadian Journal of Chemical Engineering. 50 (1972) 95-100.
https://doi.org/10.1002/cjce.5450500117
T / K =	353.15				Chart (double-click image to zoom in)
P / bar =	70.927
hᴹ / J.mol⁻¹	z₁
111	0.1
187	0.2
262	0.4
264	0.5
245	0.6
210	0.7
157	0.8
86	0.9
Additional data with unitary variance
Critical point					Chart (double-click image to zoom in)
Hwang, S.C. - Lin, H.M. - Chappelear, P.S. - Kobayashi, R., Dew-Point Values for the Methane - Carbon Dioxide System, GPA Research Report. (1976) 1-14.
T / K	P / bar	x₁
191.2	46.333	0.9932
191.87	46.678	0.9873
193.15	47.298	0.9736
197.59	49.849	0.9314
203.15	53.296	0.888
210.15	58.192	0.837
213.71	60.674	0.81
219.26	64.673	0.768
Mraw, S.C. - Hwang, S.C. - Kobayashi, R., The Vapor-Liquid Equilibrium of the CH4 - CO2 System at Low Temperatures, GPA Research Report. (1977) 1-18.
T / K	P / bar	x₁
193.15	47.367	0.9736
203.15	53.448	0.8784
210.15	58.261	0.837
219.26	64.742	0.7483
219.26	64.866	0.7483
Arai, Yasuhiko - Kaminishi, Gen-Ichi - Saito, Shozaburo, The Experimental Determination Of The P-V-T-X Relations For The Carbon Dioxide-Nitrogen And The Carbon Dioxide-Methane Systems, Journal of Chemical Engineering of Japan. 4 (1971) 113-122.
https://doi.org/10.1252/jcej.4.113
T / K	P / bar	x₁
253.15	83.492	0.475
273.15	85.518	0.3

## Sheet: 1_1922
Name	METHANE		HYDROGEN SULFIDE
CAS	74-82-8		7783-06-4
Critical temperature / K	190.564		373.53
Critical pressure / bar	45.99		89.629
Acentric factor	0.012		0.094
	Source: DIPPR May 2017
Phase equilibrium data
Isothermal phase equilibrium data
Reamer, H. H. - Sage, B. H. - Lacey, W. N., Phase Equilibria in Hydrocarbon Systems - Volumetric and Phase Behavior of the Methane-Hydrogen Sulfide System, Industrial & Engineering Chemistry. 43 (1951) 976-981.
https://doi.org/10.1021/ie50496a052
T / K =	277.59				Chart (double-click image to zoom in)
P / bar	x₁	y₁
13.79	0.0057	0.1371
17.237	0.0132	0.2783
20.684	0.0212	0.3896
24.132	0.0284	0.4604
27.579	0.0354	0.5126
31.026	0.0424	0.5551
34.474	0.0493	0.5879
41.369	0.0636	0.6394
48.263	0.0783	0.6755
55.158	0.093	0.6989
62.053	0.1083	0.7141
68.948	0.125	0.7242
75.842	0.1433	0.7299
82.737	0.1635	0.7321
86.184	0.175	0.7319
89.632	0.1868	0.7306
96.527	0.2137	0.7262
103.42	0.245	0.7185
110.32	0.2798	0.7075
117.21	0.324	0.6931
120.66	0.3492	0.6828
124.11	0.3758	0.6686
131	0.4401	0.613
134.38	0.55	0.55	CRIT
Reamer, H. H. - Sage, B. H. - Lacey, W. N., Phase Equilibria in Hydrocarbon Systems - Volumetric and Phase Behavior of the Methane-Hydrogen Sulfide System, Industrial & Engineering Chemistry. 43 (1951) 976-981.
https://doi.org/10.1021/ie50496a052
T / K =	310.93				Chart (double-click image to zoom in)
P / bar	x₁	y₁
27.579	0.0007	0.0117
31.026	0.0067	0.0963
34.474	0.0128	0.1642
37.921	0.019	0.2203
41.369	0.0255	0.2688
48.263	0.0385	0.3416
55.158	0.0523	0.3976
62.053	0.067	0.4396
68.948	0.0828	0.4707
75.842	0.0996	0.4923
82.737	0.1182	0.5079
86.184	0.1282	0.513
89.632	0.139	0.5182
96.527	0.162	0.524
103.42	0.1885	0.5255
110.32	0.2192	0.5195
117.21	0.2532	0.5058
120.66	0.2725	0.4947
124.11	0.294	0.4797
127.55	0.3185	0.458
131	0.3578	0.419
131.48	0.388	0.388	CRIT
Reamer, H. H. - Sage, B. H. - Lacey, W. N., Phase Equilibria in Hydrocarbon Systems - Volumetric and Phase Behavior of the Methane-Hydrogen Sulfide System, Industrial & Engineering Chemistry. 43 (1951) 976-981.
https://doi.org/10.1021/ie50496a052
T / K =	344.26				Chart (double-click image to zoom in)
P / bar	x₁	y₁
55.158	0.0031	0.0196
58.605	0.0098	0.0592
62.053	0.0167	0.0946
68.948	0.0309	0.1553
75.842	0.0459	0.2021
82.737	0.0622	0.2367
86.184	0.072	0.2534
89.632	0.0814	0.2646
96.527	0.1021	0.2811
103.42	0.1245	0.2775
110.32	0.1547	0.258
113.76	0.183	0.2295
114.45	0.209	0.209	CRIT
Isobaric phase equilibrium data
Kohn, James P. - Kurata, Fred, Heterogeneous phase equilibria of the methane—hydrogen sulfide system, AIChE Journal. 4 (1958) 211-217.
https://doi.org/10.1002/aic.690040217
P / bar =	13.788				Chart (double-click image to zoom in)
T / K	x₁	y₁
277.59	0.005	0.14
255.38	0.009	0.522
233.15	0.0125	0.754
210.93	0.018	0.906
Kohn, James P. - Kurata, Fred, Heterogeneous phase equilibria of the methane—hydrogen sulfide system, AIChE Journal. 4 (1958) 211-217.
https://doi.org/10.1002/aic.690040217
P / bar =	55.153				Chart (double-click image to zoom in)
T / K	x₁	y₁
338.7	0.01	0.104
322.03	0.035	0.29
310.92	0.051	0.405
299.81	0.068	0.501
288.7	0.086	0.596
277.59	0.09	0.69
Kohn, James P. - Kurata, Fred, Heterogeneous phase equilibria of the methane—hydrogen sulfide system, AIChE Journal. 4 (1958) 211-217.
https://doi.org/10.1002/aic.690040217
P / bar =	82.729				Chart (double-click image to zoom in)
T / K	x₁	y₁
366.48	0.006	0.025
344.26	0.052	0.238
322.03	0.095	0.432
299.81	0.135	0.582
277.59	0.162	0.727
Kohn, James P. - Kurata, Fred, Heterogeneous phase equilibria of the methane—hydrogen sulfide system, AIChE Journal. 4 (1958) 211-217.
https://doi.org/10.1002/aic.690040217
P / bar =	110.31				Chart (double-click image to zoom in)
T / K	x₁	y₁
344.26	0.155	0.25
322.03	0.184	0.441
310.92	0.2	0.52
299.81	0.213	0.586
277.59	0.238	0.705
Property change of mixing data
Enthalpy of mixing
Barry, Alpha O. - Kaliaguine, Serge C. - Ramalho, Rubens S., Excess enthalpies of the binary system methane-hydrogen sulfide by flow calorimetry, Journal of Chemical & Engineering Data. 27 (1982) 436-439.
https://doi.org/10.1021/je00030a020
T / K =	293.15				Chart (double-click image to zoom in)
P / bar =	5.07
hᴹ / J.mol⁻¹	z₁
28.3	0.203
43.6	0.399
44.8	0.56
41.2	0.672
40.5	0.71
38.8	0.777
Barry, Alpha O. - Kaliaguine, Serge C. - Ramalho, Rubens S., Excess enthalpies of the binary system methane-hydrogen sulfide by flow calorimetry, Journal of Chemical & Engineering Data. 27 (1982) 436-439.
https://doi.org/10.1021/je00030a020
T / K =	293.15				Chart (double-click image to zoom in)
P / bar =	10.13
hᴹ / J.mol⁻¹	z₁
79.8	0.265
101.1	0.431
97.1	0.659
Barry, Alpha O. - Kaliaguine, Serge C. - Ramalho, Rubens S., Excess enthalpies of the binary system methane-hydrogen sulfide by flow calorimetry, Journal of Chemical & Engineering Data. 27 (1982) 436-439.
https://doi.org/10.1021/je00030a020
T / K =	293.15				Chart (double-click image to zoom in)
P / bar =	15.2
hᴹ / J.mol⁻¹	z₁
123.6	0.184
149.5	0.245
190.8	0.483
184.6	0.594
138.8	0.793
Barry, Alpha O. - Kaliaguine, Serge C. - Ramalho, Rubens S., Excess enthalpies of the binary system methane-hydrogen sulfide by flow calorimetry, Journal of Chemical & Engineering Data. 27 (1982) 436-439.
https://doi.org/10.1021/je00030a020
T / K =	305.15				Chart (double-click image to zoom in)
P / bar =	5.07
hᴹ / J.mol⁻¹	z₁
23.8	0.206
39.7	0.456
40.7	0.621
37	0.738
Barry, Alpha O. - Kaliaguine, Serge C. - Ramalho, Rubens S., Excess enthalpies of the binary system methane-hydrogen sulfide by flow calorimetry, Journal of Chemical & Engineering Data. 27 (1982) 436-439.
https://doi.org/10.1021/je00030a020
T / K =	305.15				Chart (double-click image to zoom in)
P / bar =	10.13
hᴹ / J.mol⁻¹	z₁
60.4	0.184
90.8	0.392
95	0.449
69.8	0.782
Barry, Alpha O. - Kaliaguine, Serge C. - Ramalho, Rubens S., Excess enthalpies of the binary system methane-hydrogen sulfide by flow calorimetry, Journal of Chemical & Engineering Data. 27 (1982) 436-439.
https://doi.org/10.1021/je00030a020
T / K =	305.15				Chart (double-click image to zoom in)
P / bar =	15.2
hᴹ / J.mol⁻¹	z₁
148.8	0.274
163.8	0.443
167.5	0.568
83.3	0.847
Barry, Alpha O. - Kaliaguine, Serge C. - Ramalho, Rubens S., Excess enthalpies of the binary system methane-hydrogen sulfide by flow calorimetry, Journal of Chemical & Engineering Data. 27 (1982) 436-439.
https://doi.org/10.1021/je00030a020
T / K =	313.15				Chart (double-click image to zoom in)
P / bar =	5.07
hᴹ / J.mol⁻¹	z₁
34.6	0.324
42.5	0.386
43.9	0.446
33.2	0.693
Barry, Alpha O. - Kaliaguine, Serge C. - Ramalho, Rubens S., Excess enthalpies of the binary system methane-hydrogen sulfide by flow calorimetry, Journal of Chemical & Engineering Data. 27 (1982) 436-439.
https://doi.org/10.1021/je00030a020
T / K =	313.15				Chart (double-click image to zoom in)
P / bar =	10.13
hᴹ / J.mol⁻¹	z₁
68	0.237
78.8	0.351
90.4	0.483
83.6	0.692
64.7	0.78
Barry, Alpha O. - Kaliaguine, Serge C. - Ramalho, Rubens S., Excess enthalpies of the binary system methane-hydrogen sulfide by flow calorimetry, Journal of Chemical & Engineering Data. 27 (1982) 436-439.
https://doi.org/10.1021/je00030a020
T / K =	313.15				Chart (double-click image to zoom in)
P / bar =	15.2
hᴹ / J.mol⁻¹	z₁
119.2	0.272
139	0.324
135.5	0.602
97.3	0.778
Additional data with unitary variance
Critical point					Chart (double-click image to zoom in)
Reamer, H. H. - Sage, B. H. - Lacey, W. N., Phase Equilibria in Hydrocarbon Systems - Volumetric and Phase Behavior of the Methane-Hydrogen Sulfide System, Industrial & Engineering Chemistry. 43 (1951) 976-981.
https://doi.org/10.1021/ie50496a052
T / K	P / bar	x₁
267.15	133.48	0.6
288.09	134.72	0.5
308.59	132.03	0.4
327.59	124.93	0.3
345.71	113.56	0.2
361.09	101.56	0.1

## Sheet: 7_1051
Name	n-PENTANE		ACETONE
CAS	109-66-0		67-64-1
Critical temperature / K	469.7		508.2
Critical pressure / bar	33.7		47.01
Acentric factor	0.252		0.307
	Source: DIPPR May 2017
Phase equilibrium data
Isothermal phase equilibrium data
Rall, W. - Schäfer, K., Thermodynamische Untersuchungen an flüssigen Mischsystemen von Aceton und n-Pentan sowie von Aceton und n-Hexan, Z. Elektrochem. 63 (1959) 1019-1024.
T / K =	258.15				Chart (double-click image to zoom in)
P / bar	x₁	y₁
0.077874	0.0497	0.5079
0.1072	0.1269	0.6617
0.1171	0.1639	0.689
0.12911	0.2851	0.7319
0.13324	0.3857	0.7442
0.13506	0.473	0.749
0.13532	0.5459	0.755
0.13652	0.658	0.765
0.13706	0.7173	0.7689
0.13719	0.8325	0.7933
0.13288	0.9287	0.849
Rall, W. - Schäfer, K., Thermodynamische Untersuchungen an flüssigen Mischsystemen von Aceton und n-Pentan sowie von Aceton und n-Hexan, Z. Elektrochem. 63 (1959) 1019-1024.
T / K =	298.15				Chart (double-click image to zoom in)
P / bar	x₁	y₁
0.34077	0.0094	0.1055
0.4581	0.054	0.3633
0.52849	0.0887	0.4592
0.62448	0.16	0.5648
0.73301	0.3741	0.6654
0.73047	0.388	0.6658
0.75607	0.4721	0.6865
0.7666	0.5689	0.7074
0.77634	0.6548	0.7274
0.77674	0.7192	0.7442
0.7782	0.7787	0.7623
0.75287	0.9223	0.8486
Campbell, Scott W. - Wilsak, Richard A. - Thodos, George, Isothermal vapor-liquid equilibrium measurements for the n-pentane-acetone system at 372.7, 397.7, and 422.6 K, Journal of Chemical & Engineering Data. 31 (1986) 424-430.
https://doi.org/10.1021/je00046a016
T / K =	372.7				Chart (double-click image to zoom in)
P / bar	x₁	y₁
4.781	0.084	0.265
5.516	0.18	0.374
6.133	0.315	0.51
6.422	0.422	0.546
6.609	0.532	0.616
6.722	0.649	0.671
6.681	0.785	0.753
6.378	0.916	0.869
Campbell, Scott W. - Wilsak, Richard A. - Thodos, George, Isothermal vapor-liquid equilibrium measurements for the n-pentane-acetone system at 372.7, 397.7, and 422.6 K, Journal of Chemical & Engineering Data. 31 (1986) 424-430.
https://doi.org/10.1021/je00046a016
T / K =	397.7				Chart (double-click image to zoom in)
P / bar	x₁	y₁
7.601	0.044	0.135
8.208	0.087	0.208
8.863	0.133	0.294
9.68	0.21	0.392
10.47	0.331	0.478
10.839	0.412	0.533
11.097	0.495	0.569
11.28	0.576	0.621
11.36	0.684	0.684	AZEO
11.349	0.702	0.701
11.145	0.824	0.79
10.676	0.919	0.882
Campbell, Scott W. - Wilsak, Richard A. - Thodos, George, Isothermal vapor-liquid equilibrium measurements for the n-pentane-acetone system at 372.7, 397.7, and 422.6 K, Journal of Chemical & Engineering Data. 31 (1986) 424-430.
https://doi.org/10.1021/je00046a016
T / K =	422.6				Chart (double-click image to zoom in)
P / bar	x₁	y₁
13.624	0.114	0.208
14.81	0.18	0.298
15.868	0.257	0.381
17.392	0.445	0.537
17.985	0.658	0.663
17.99	0.676	0.676	AZEO
17.819	0.794	0.77
17.223	0.879	0.847
16.358	0.956	0.931
Property change of mixing data
Enthalpy of mixing
Schaefer, K., Excess enthalpies of acetone + n-​alkane (C3-​C6) binary mixtures, Int. Data Ser. Sel. Data Mixtures Ser. A. (1978) 74-77.
T / K =	243.2				Chart (double-click image to zoom in)
P / bar =	UNKNOWN (1.0132)
hᴹ / J.mol⁻¹	x₁
284	0.0507
583	0.1153
814	0.1822
1030	0.2677
1148	0.3481
1207	0.4312
1223	0.471
1229	0.4868
1236	0.5635
1174	0.6552
1120	0.7009
968	0.7892
789	0.8634
611	0.9047
396	0.9462
Schaefer, K., Excess enthalpies of acetone + n-​alkane (C3-​C6) binary mixtures, Int. Data Ser. Sel. Data Mixtures Ser. A. (1978) 74-77.
T / K =	253.2				Chart (double-click image to zoom in)
P / bar =	UNKNOWN (1.0132)
hᴹ / J.mol⁻¹	x₁
463	0.0859
791	0.1716
1029	0.2544
1170	0.3324
1256	0.4298
1276	0.5061
1280	0.5727
1268	0.6168
1179	0.6868
1084	0.7513
946	0.8129
714	0.8854
402	0.9474
Schaefer, K., Excess enthalpies of acetone + n-​alkane (C3-​C6) binary mixtures, Int. Data Ser. Sel. Data Mixtures Ser. A. (1978) 74-77.
T / K =	273.2				Chart (double-click image to zoom in)
P / bar =	UNKNOWN (1.0132)
hᴹ / J.mol⁻¹	x₁
335	0.0584
623	0.1181
922	0.2006
1096	0.2643
1251	0.3332
1327	0.4073
1367	0.4672
1374	0.5456
1345	0.6301
1239	0.7056
1068	0.792
802	0.8743
519	0.929
292	0.9664
Schaefer, K., Excess enthalpies of acetone + n-​alkane (C3-​C6) binary mixtures, Int. Data Ser. Sel. Data Mixtures Ser. A. (1978) 74-77.
T / K =	293.2				Chart (double-click image to zoom in)
P / bar =	UNKNOWN (1.0132)
hᴹ / J.mol⁻¹	x₁
314	0.0534
745	0.1452
1037	0.2256
1254	0.3026
1387	0.3805
1426	0.4292
1440	0.4883
1450	0.5704
1386	0.6553
1282	0.7261
1133	0.7882
892	0.8567
540	0.929
Additional data with unitary variance
Critical point					Chart (double-click image to zoom in)
Hajjar, Raja F. - Cherry, R.H. - Kay, W.B., Critical properties of the vapor—liquid equilibria of the binary system acetone—n-pentane, Fluid Phase Equilibria. 25 (1986) 137-146.
https://doi.org/10.1016/0378-3812(86)80011-5
T / K	P / bar	x₁
467.07	36.17	0.8003
467.42	37.13	0.7188
468.66	37.91	0.649
469.81	38.64	0.5967
471.31	39.23	0.543
472.99	39.73	0.5141
483.65	43.2	0.3154
499.95	46.1	0.0708
Kay, Webster B., P-T-x Diagrams in the Critical Region. Acetone-n-Alkane Systems, The Journal of Physical Chemistry. 68 (1964) 827-831.
https://doi.org/10.1021/j100786a021
T / K	P / bar	x₁
467.65	35.768	0.799
468.65	37.693	0.626
472.25	39.618	0.539
483.65	43.266	0.315

## Sheet: 11_1052
Name	n-HEXANE		METHYL ETHYL KETONE
CAS	110-54-3		78-93-3
Critical temperature / K	507.6		535.5
Critical pressure / bar	30.25		41.5
Acentric factor	0.301		0.323
	Source: DIPPR May 2017
Phase equilibrium data
Isothermal phase equilibrium data
Hanson, Donald O. - Van Winkle, Matthew, Alteration of the relative volatility of hexane-1-hexene by oxygenated and chlorinated solvents, Journal of Chemical & Engineering Data. 12 (1967) 319-325.
https://doi.org/10.1021/je60034a009
T / K =	333.15				Chart (double-click image to zoom in)
P / bar	x₁	y₁
0.66901	0.095	0.282
0.67021	0.098	0.288
0.75874	0.197	0.419
0.8078	0.282	0.484
0.8466	0.395	0.55
0.86433	0.479	0.597
0.87579	0.556	0.626
0.88153	0.716	0.697
0.87246	0.803	0.748
0.85526	0.872	0.804
0.83433	0.916	0.854
0.803	0.961	0.917
Isobaric phase equilibrium data
Lladosa, Estela - Martínez, Nelson F. - Montón, Juan B. - de la Torre, Javier, Measurements and correlation of vapour–liquid equilibria of 2-butanone and hydrocarbons binary systems at two different pressures, Fluid Phase Equilibria. 307 (2011) 24-29.
https://doi.org/10.1016/j.fluid.2011.05.004
P / bar =	0.3				Chart (double-click image to zoom in)
T / K	x₁	y₁
317.76	0.01	0.056
313.8	0.052	0.218
310.48	0.108	0.348
308.23	0.17	0.434
306.78	0.239	0.495
305.54	0.317	0.539
304.94	0.386	0.58
304.43	0.459	0.608
304.08	0.537	0.636
303.91	0.616	0.665
303.83	0.697	0.696
303.9	0.702	0.702	AZEO
303.93	0.778	0.733
304.38	0.858	0.783
305.4	0.931	0.868
Lladosa, Estela - Martínez, Nelson F. - Montón, Juan B. - de la Torre, Javier, Measurements and correlation of vapour–liquid equilibria of 2-butanone and hydrocarbons binary systems at two different pressures, Fluid Phase Equilibria. 307 (2011) 24-29.
https://doi.org/10.1016/j.fluid.2011.05.004
P / bar =	1.013				Chart (double-click image to zoom in)
T / K	x₁	y₁
352.4	0.002	0.009
347.18	0.071	0.221
344.15	0.132	0.333
341.97	0.197	0.412
340.45	0.262	0.465
339.36	0.328	0.511
338.54	0.399	0.55
337.95	0.474	0.584
337.59	0.553	0.619
337.38	0.628	0.652
337.4	0.679	0.679	AZEO
337.42	0.706	0.691
337.64	0.783	0.735
338.3	0.86	0.792
339.6	0.933	0.876
Property change of mixing data
Enthalpy of mixing
Murakami, Sachio - Amaya, Kazuo - Fujishiro, Ryoichi, Heats of Mixing for Binary Mixtures. The Energy of Hydrogen Bonding between Alcohol and Ketone Molecules, Bulletin of the Chemical Society of Japan. 37 (1964) 1776-1780.
https://doi.org/10.1246/bcsj.37.1776
T / K =	298.15				Chart (double-click image to zoom in)
P / bar =	UNKNOWN (1.0132)
hᴹ / J.mol⁻¹	x₁
946.63	0.2475
1245.2	0.4453
1267.3	0.5658
1162.3	0.6695
984.74	0.7602
687.47	0.8576
495.3	0.9181
354.62	0.9437
Kiyohara, Osamu - Benson, George C - Grolier, Jean-Pierre E, Thermodynamic properties of binary mixtures containing ketones I. Excess enthalpies of some aliphatic ketones + n-hexane, + benzene, and + tetrachloromethane, The Journal of Chemical Thermodynamics. 9 (1977) 315-323.
https://doi.org/10.1016/0021-9614(77)90052-0
T / K =	298.15				Chart (double-click image to zoom in)
P / bar =	UNKNOWN (1.0132)
hᴹ / J.mol⁻¹	x₁
233.8	0.05
442.3	0.1
625.8	0.15
782.5	0.2
915.5	0.25
1026.9	0.3
1114.7	0.35
1182.8	0.4
1228.9	0.45
1252.4	0.5
1259.1	0.55
1240.2	0.6
1200.1	0.65
1136.4	0.7
1045.4	0.75
925.1	0.8
765.9	0.85
567.5	0.9
319.7	0.95
Additional data with unitary variance
Critical point					Chart (double-click image to zoom in)
Kay, W.B. - Young, C.L., Gas-​liquid critical properties. 2-​Butanone (methyl ethyl ketone)​-​n-​hexane system, Int. Data Ser. Sel. Data Mixtures Ser. A. 1975 (1975) 139-156.
T / K	P / bar	x₁
505.51	32.97	0.7829
511.43	36.89	0.4473
517.23	38.47	0.3098
526.91	40.44	0.1331
Kreglewski, Aleksander - Kay, Webster B., Critical constants of conformed mixtures, The Journal of Physical Chemistry. 73 (1969) 3359-3366.
https://doi.org/10.1021/j100844a035
T / K	P / bar	x₁
505.75	33.991	0.7
506.05	31.647	0.9
509.65	36.266	0.5
517.7	38.611	0.3
529.15	40.693	0.1

## Sheet: 201_909
Name	ETHYLENE		CARBON DIOXIDE
CAS	74-85-1		124-38-9
Critical temperature / K	282.34		304.21
Critical pressure / bar	50.41		73.83
Acentric factor	0.086		0.224
	Source: DIPPR May 2017
Phase equilibrium data
Isothermal phase equilibrium data
Mollerup, Jørgen, Vapour/liquid equilibrium in ethylene + carbon dioxide and ethane + carbon dioxide, Journal of the Chemical Society, Faraday Transactions 1: Physical Chemistry in Condensed Phases. 71 (1975)
https://doi.org/10.1039/f19757102351
T / K =	223.15				Chart (double-click image to zoom in)
P / bar	x₁	y₁
7.321	0.0365	0.0946
8.028	0.0985	0.2088
8.8281	0.1941	0.3354
9.494	0.3018	0.436
9.9361	0.4029	0.512
10.345	0.5305	0.6035
10.537	0.6093	0.6573
10.69	0.7149	0.7363
10.74	0.828	0.828	AZEO
10.732	0.8641	0.8619
10.645	0.9633	0.9604
Nagahama, Kunio - Konishi, Hitoshi - Hoshino, Daisuke - Hirata, Mitsuho, Binary Vapor-Liquid Equilibria Of Carbon Dioxide-Light Hydrocarbons At Low Temperature, Journal of Chemical Engineering of Japan. 7 (1974) 323-328.
https://doi.org/10.1252/jcej.7.323
T / K =	231.55				Chart (double-click image to zoom in)
P / bar	x₁	y₁
10.436	0.052	0.115
10.943	0.086	0.181
11.855	0.167	0.28
12.615	0.265	0.385
13.324	0.428	0.498
13.679	0.49	0.562
13.983	0.587	0.635
14.135	0.725	0.735
14.186	0.821	0.821	AZEO
14.186	0.824	0.822
14.034	0.921	0.916
Mollerup, Jørgen, Vapour/liquid equilibrium in ethylene + carbon dioxide and ethane + carbon dioxide, Journal of the Chemical Society, Faraday Transactions 1: Physical Chemistry in Condensed Phases. 71 (1975)
https://doi.org/10.1039/f19757102351
T / K =	243.15				Chart (double-click image to zoom in)
P / bar	x₁	y₁
15.88	0.0872	0.1563
17.171	0.1807	0.2775
17.951	0.2596	0.3528
18.73	0.365	0.4391
19.26	0.4593	0.5152
19.94	0.7432	0.7382
19.94	0.748	0.748	AZEO
19.59	0.9254	0.9156
Nagahama, Kunio - Konishi, Hitoshi - Hoshino, Daisuke - Hirata, Mitsuho, Binary Vapor-Liquid Equilibria Of Carbon Dioxide-Light Hydrocarbons At Low Temperature, Journal of Chemical Engineering of Japan. 7 (1974) 323-328.
https://doi.org/10.1252/jcej.7.323
T / K =	252.95				Chart (double-click image to zoom in)
P / bar	x₁	y₁
20.924	0.06	0.105
22.038	0.113	0.18
23.71	0.233	0.315
24.622	0.324	0.396
25.585	0.453	0.501
25.686	0.494	0.539
25.939	0.534	0.567
26.142	0.638	0.653
25.99	0.825	0.817
25.838	0.873	0.864
25.483	0.929	0.928
Bae, Hyo Kwang - Nagahama, Kunio - Hirata, Mitsuho, Isothermal vapor-liquid equilibriums for the ethylene-carbon dioxide system at high pressure, Journal of Chemical & Engineering Data. 27 (1982) 25-27.
https://doi.org/10.1021/je00027a007
T / K =	263.14				Chart (double-click image to zoom in)
P / bar	x₁	y₁
27.824	0.049	0.084
29.212	0.106	0.166
30.793	0.204	0.268
32.231	0.31	0.365
33.022	0.405	0.444
33.528	0.485	0.524
33.964	0.6	0.613
33.984	0.669	0.67
33.995	0.675	0.675	AZEO
33.893	0.764	0.75
33.539	0.837	0.825
Bae, Hyo Kwang - Nagahama, Kunio - Hirata, Mitsuho, Isothermal vapor-liquid equilibriums for the ethylene-carbon dioxide system at high pressure, Journal of Chemical & Engineering Data. 27 (1982) 25-27.
https://doi.org/10.1021/je00027a007
T / K =	273.16				Chart (double-click image to zoom in)
P / bar	x₁	y₁
36.001	0.039	0.056
37.359	0.089	0.125
38.858	0.155	0.202
40.206	0.226	0.273
41.462	0.316	0.355
42.627	0.433	0.458
43.185	0.526	0.539
43.377	0.594	0.598
43.398	0.646	0.646	AZEO
43.418	0.667	0.666
43.397	0.684	0.681
43.154	0.754	0.751
42.749	0.817	0.809
42.212	0.884	0.878
41.422	0.952	0.95
Bae, Hyo Kwang - Nagahama, Kunio - Hirata, Mitsuho, Isothermal vapor-liquid equilibriums for the ethylene-carbon dioxide system at high pressure, Journal of Chemical & Engineering Data. 27 (1982) 25-27.
https://doi.org/10.1021/je00027a007
T / K =	283.16				Chart (double-click image to zoom in)
P / bar	x₁	y₁
46.984	0.06	0.081
48.271	0.105	0.139
49.862	0.159	0.206
51.858	0.261	0.297
52.993	0.338	0.367
54.097	0.453	0.466
54.513	0.535	0.539
54.786	0.617	0.618
54.493	0.707	0.705
54.412	0.72	0.719
54.381	0.725	0.725	CRIT
Bae, Hyo Kwang - Nagahama, Kunio - Hirata, Mitsuho, Isothermal vapor-liquid equilibriums for the ethylene-carbon dioxide system at high pressure, Journal of Chemical & Engineering Data. 27 (1982) 25-27.
https://doi.org/10.1021/je00027a007
T / K =	298.15				Chart (double-click image to zoom in)
P / bar	x₁	y₁
65.466	0.033	0.04
66.976	0.071	0.081
68.556	0.113	0.123
69.012	0.13	0.135
69.175	0.137	0.137	CRIT
Isobaric phase equilibrium data
Haselden, G. G. - Newitt, D. M. - Shah, S. M., Two-Phase Equilibrium in Binary and Ternary Systems. V. Carbon Dioxide-Ethylene. VI. Carbon Dioxide-Propylene, Proceedings of the Royal Society A: Mathematical, Physical and Engineering Sciences. 209 (1951) 1-14.
https://doi.org/10.1098/rspa.1951.0183
P / bar =	30.398				Chart (double-click image to zoom in)
T / K	x₁
264.97	0.094
262.47	0.2113
260.86	0.3004
259.78	0.4025
259.12	0.5015
258.73	0.6327
258.57	0.7059
258.83	0.7904
258.98	0.847
259.2	0.8933
Haselden, G. G. - Newitt, D. M. - Shah, S. M., Two-Phase Equilibrium in Binary and Ternary Systems. V. Carbon Dioxide-Ethylene. VI. Carbon Dioxide-Propylene, Proceedings of the Royal Society A: Mathematical, Physical and Engineering Sciences. 209 (1951) 1-14.
https://doi.org/10.1098/rspa.1951.0183
P / bar =	30.398				Chart (double-click image to zoom in)
T / K	y₁
266.3	0.094
264.37	0.2113
262.62	0.3004
261.01	0.4025
259.81	0.5015
258.95	0.6327
258.66	0.7059
259.08	0.7904
259.38	0.847
259.75	0.8933
Haselden, G. G. - Newitt, D. M. - Shah, S. M., Two-Phase Equilibrium in Binary and Ternary Systems. V. Carbon Dioxide-Ethylene. VI. Carbon Dioxide-Propylene, Proceedings of the Royal Society A: Mathematical, Physical and Engineering Sciences. 209 (1951) 1-14.
https://doi.org/10.1098/rspa.1951.0183
P / bar =	40.53				Chart (double-click image to zoom in)
T / K	x₁
275.96	0.094
273.63	0.2113
272.05	0.3004
271.15	0.4025
270.4	0.5015
270.11	0.6327
270.03	0.7059
270.35	0.7904
270.67	0.847
270.92	0.8933
Haselden, G. G. - Newitt, D. M. - Shah, S. M., Two-Phase Equilibrium in Binary and Ternary Systems. V. Carbon Dioxide-Ethylene. VI. Carbon Dioxide-Propylene, Proceedings of the Royal Society A: Mathematical, Physical and Engineering Sciences. 209 (1951) 1-14.
https://doi.org/10.1098/rspa.1951.0183
P / bar =	40.53				Chart (double-click image to zoom in)
T / K	y₁
276.78	0.094
274.84	0.2113
272.98	0.3004
271.78	0.4025
270.78	0.5015
270.19	0.6327
270.13	0.7059
270.51	0.7904
270.95	0.847
271.35	0.8933
Haselden, G. G. - Newitt, D. M. - Shah, S. M., Two-Phase Equilibrium in Binary and Ternary Systems. V. Carbon Dioxide-Ethylene. VI. Carbon Dioxide-Propylene, Proceedings of the Royal Society A: Mathematical, Physical and Engineering Sciences. 209 (1951) 1-14.
https://doi.org/10.1098/rspa.1951.0183
P / bar =	45.596				Chart (double-click image to zoom in)
T / K	x₁
280.67	0.094
278.37	0.2113
276.83	0.3004
275.75	0.4025
275.23	0.5015
274.93	0.6327
274.97	0.7059
275.4	0.7904
275.77	0.847
276.12	0.8933
Haselden, G. G. - Newitt, D. M. - Shah, S. M., Two-Phase Equilibrium in Binary and Ternary Systems. V. Carbon Dioxide-Ethylene. VI. Carbon Dioxide-Propylene, Proceedings of the Royal Society A: Mathematical, Physical and Engineering Sciences. 209 (1951) 1-14.
https://doi.org/10.1098/rspa.1951.0183
P / bar =	45.596				Chart (double-click image to zoom in)
T / K	y₁
281.7	0.094
279.36	0.2113
277.65	0.3004
276.43	0.4025
275.53	0.5015
274.95	0.6327
275.05	0.7059
275.53	0.7904
276	0.847
276.38	0.8933
Property change of mixing data
Enthalpy of mixing
Wormald, C.J. - Eyears, J.M., Excess molar enthalpies of (carbon dioxide + ethene) in the liquid and near-critical regions, The Journal of Chemical Thermodynamics. 33 (2001) 775-786.
https://doi.org/10.1006/jcht.2000.0778
T / K =	260.95				Chart (double-click image to zoom in)
P / bar =	35
hᴹ / J.mol⁻¹	z₁
562	0.237
685	0.316
779	0.396
793	0.475
805	0.517
800	0.557
783	0.595
716	0.638
643	0.678
Wormald, C.J. - Eyears, J.M., Excess molar enthalpies of (carbon dioxide + ethene) in the liquid and near-critical regions, The Journal of Chemical Thermodynamics. 33 (2001) 775-786.
https://doi.org/10.1006/jcht.2000.0778
T / K =	276.65				Chart (double-click image to zoom in)
P / bar =	110
hᴹ / J.mol⁻¹	z₁
126	0.052
246	0.101
377	0.151
499	0.201
584	0.25
631	0.301
688	0.352
722	0.402
734	0.452
734	0.503
720	0.553
700	0.661
645	0.651
602	0.703
338	0.851
Wormald, C.J. - Eyears, J.M., Excess molar enthalpies of (carbon dioxide + ethene) in the liquid and near-critical regions, The Journal of Chemical Thermodynamics. 33 (2001) 775-786.
https://doi.org/10.1006/jcht.2000.0778
T / K =	276.65				Chart (double-click image to zoom in)
P / bar =	47.5
hᴹ / J.mol⁻¹	z₁
102	0.041
217	0.08
332	0.12
429	0.159
500	0.198
590	0.238
646	0.277
720	0.318
780	0.357
811	0.398
855	0.437
858	0.477
886	0.516
885	0.553
853	0.597
851	0.64
822	0.68
691	0.761
604	0.801
507	0.842
Wormald, C.J. - Eyears, J.M., Excess molar enthalpies of (carbon dioxide + ethene) in the liquid and near-critical regions, The Journal of Chemical Thermodynamics. 33 (2001) 775-786.
https://doi.org/10.1006/jcht.2000.0778
T / K =	285.85				Chart (double-click image to zoom in)
P / bar =	110
hᴹ / J.mol⁻¹	z₁
98	0.049
295	0.1
399	0.153
503	0.201
600	0.251
682	0.303
750	0.402
741	0.501
730	0.551
703	0.595
660	0.638
620	0.69
555	0.74
448	0.802
361	0.852
Wormald, C.J. - Eyears, J.M., Excess molar enthalpies of (carbon dioxide + ethene) in the liquid and near-critical regions, The Journal of Chemical Thermodynamics. 33 (2001) 775-786.
https://doi.org/10.1006/jcht.2000.0778
T / K =	285.85				Chart (double-click image to zoom in)
P / bar =	62.5
hᴹ / J.mol⁻¹	z₁
410	0.161
547	0.199
648	0.24
737	0.279
829	0.32
892	0.359
957	0.4
1007	0.439
1053	0.479
1059	0.522
1074	0.561
1055	0.599
1024	0.642
936	0.682
820	0.719
703	0.762
595	0.802
490	0.843
Wormald, C.J. - Eyears, J.M., Excess molar enthalpies of (carbon dioxide + ethene) in the liquid and near-critical regions, The Journal of Chemical Thermodynamics. 33 (2001) 775-786.
https://doi.org/10.1006/jcht.2000.0778
T / K =	300.45				Chart (double-click image to zoom in)
P / bar =	110
hᴹ / J.mol⁻¹	z₁
139	0.052
300	0.101
452	0.151
561	0.201
659	0.25
726	0.301
812	0.352
847	0.402
830	0.451
831	0.503
830	0.553
792	0.601
730	0.651
665	0.703
592	0.753
473	0.801
373	0.851
229	0.902
103	0.951
Wormald, C.J. - Eyears, J.M., Excess molar enthalpies of (carbon dioxide + ethene) in the liquid and near-critical regions, The Journal of Chemical Thermodynamics. 33 (2001) 775-786.
https://doi.org/10.1006/jcht.2000.0778
T / K =	300.45				Chart (double-click image to zoom in)
P / bar =	75
hᴹ / J.mol⁻¹	z₁
210	0.042
415	0.081
675	0.122
954	0.161
1295	0.201
1639	0.241
1925	0.281
2148	0.321
2249	0.361
2309	0.402
2286	0.441
2200	0.481
2131	0.523
2043	0.563
1895	0.601
1762	0.643
1586	0.683
1422	0.721
1242	0.763
1021	0.803
768	0.844
600	0.881
328	0.925
131	0.964
Wormald, C.J. - Eyears, J.M., Excess molar enthalpies of (carbon dioxide + ethene) in the liquid and near-critical regions, The Journal of Chemical Thermodynamics. 33 (2001) 775-786.
https://doi.org/10.1006/jcht.2000.0778
T / K =	300.45				Chart (double-click image to zoom in)
P / bar =	65.7
hᴹ / J.mol⁻¹	z₁
247	0.101
340	0.15
418	0.201
471	0.25
539	0.331
582	0.348
610	0.398
630	0.499
631	0.549
585	0.652
Wormald, C.J. - Eyears, J.M., Excess molar enthalpies of (carbon dioxide + ethene) in the liquid and near-critical regions, The Journal of Chemical Thermodynamics. 33 (2001) 775-786.
https://doi.org/10.1006/jcht.2000.0778
T / K =	305.75				Chart (double-click image to zoom in)
P / bar =	80.5
hᴹ / J.mol⁻¹	z₁
887	0.072
1254	0.084
1764	0.125
2028	0.167
2176	0.209
2223	0.25
2340	0.293
2204	0.334
2194	0.374
2157	0.415
2076	0.458
1943	0.5
1833	0.542
1681	0.583
1580	0.625
1360	0.668
1304	0.709
991	0.751
904	0.795
613	0.835
Wormald, C.J. - Eyears, J.M., Excess molar enthalpies of (carbon dioxide + ethene) in the liquid and near-critical regions, The Journal of Chemical Thermodynamics. 33 (2001) 775-786.
https://doi.org/10.1006/jcht.2000.0778
T / K =	306.62				Chart (double-click image to zoom in)
P / bar =	110
hᴹ / J.mol⁻¹	z₁
155	0.05
337	0.101
599	0.153
701	0.201
799	0.251
898	0.301
968	0.35
989	0.401
981	0.501
940	0.553
880	0.601
824	0.652
739	0.702
641	0.751
544	0.801
442	0.852
305	0.901
Additional data with unitary variance
Critical point					Chart (double-click image to zoom in)
Khazanova, N.E. - Sominskaya, E.E. - Zakharova, A.V. - Rozovskii, M.B. - Nechimailo, N.L., Systems with azeotropism at high pressures. X. Phase and volume relations in the ethylene-​carbon dioxide system, Zh. Fiz. Khim. 53 (1979) 1594-1597.
T / K	P / bar	x₁
282.39	52.892	0.797
284.65	56.387	0.582
288.09	59.832	0.419
293.95	64.747	0.256
Rowlinson, J.S. - Sutton, J.R. - Weston, J.F., Liquid-​vapor equilibrium in the ternary system carbon dioxide-​nitrous oxide-​ethylene, Proceedings. (1958) 10-14.
T / K	P / bar	x₁
283.15	54.108	0.8
284.75	57.35	0.6
288.55	61.504	0.4
294.95	67.28	0.2
Bae, Hyo Kwang - Nagahama, Kunio - Hirata, Mitsuho, Isothermal vapor-liquid equilibriums for the ethylene-carbon dioxide system at high pressure, Journal of Chemical & Engineering Data. 27 (1982) 25-27.
https://doi.org/10.1021/je00027a007
T / K	P / bar	x₁
293.18	65.051	0.264

## Sheet: 501_1071
Name	BENZENE		N-METHYL-2-PYRROLIDONE
CAS	71-43-2		872-50-4
Critical temperature / K	562.05		721.6
Critical pressure / bar	48.95		45.2
Acentric factor	0.21		0.373
	Source: DIPPR May 2017
Phase equilibrium data
Isothermal phase equilibrium data
Linek, Jan - Wichterle, Ivan - Marsh, Kenneth N., Vapor-Liquid Equilibria for N-Methyl-2-pyrrolidone + Benzene, +Toluene, +Heptane, and +Methylcyclohexane, Journal of Chemical & Engineering Data. 41 (1996) 1212-1218.
https://doi.org/10.1021/je9601826
T / K =	330				Chart (double-click image to zoom in)
P / bar	x₁	y₁
0.021998	0.0378	0.8043
0.025505	0.0455	0.842
0.032104	0.0615	0.8709
0.034304	0.0654	0.8804
0.090206	0.1792	0.9605
0.148	0.2925	0.9778
0.2764	0.5407	0.987
0.2944	0.5807	0.989
0.3148	0.6265	0.99
0.337	0.683	0.989
0.3506	0.719	0.987
0.3548	0.726	0.9915
0.4308	0.9135	0.997
0.4463	0.952	0.994
0.4586	0.985	0.999
Linek, Jan - Wichterle, Ivan - Marsh, Kenneth N., Vapor-Liquid Equilibria for N-Methyl-2-pyrrolidone + Benzene, +Toluene, +Heptane, and +Methylcyclohexane, Journal of Chemical & Engineering Data. 41 (1996) 1212-1218.
https://doi.org/10.1021/je9601826
T / K =	350				Chart (double-click image to zoom in)
P / bar	x₁	y₁
0.045596	0.0378	0.7335
0.053102	0.0455	0.768
0.070901	0.0654	0.8303
0.16391	0.1792	0.9381
0.2825	0.2925	0.9647
0.42261	0.4284	0.983
0.5965	0.602	0.988
0.6299	0.637	0.9885
0.6698	0.687	0.989
0.7533	0.7945	0.994
0.8066	0.8655	0.996
0.8453	0.9085	0.9975
0.8759	0.954	0.9999
0.9019	0.9825	0.9999
Isobaric phase equilibrium data
Blanco, Beatriz - Beltrán, Sagrario - Cabezas, José Luis - Coca, José, Phase Equilibria of Binary Systems Formed by Hydrocarbons from Petroleum Fractions and the Solvents N-Methylpyrrolidone and N,N-Dimethylformamide. 1. Isobaric Vapor - Liquid Equilibria, Journal of Chemical & Engineering Data. 42 (1997) 938-942.
https://doi.org/10.1021/je970059u
P / bar =	1.0133				Chart (double-click image to zoom in)
T / K	x₁	y₁
448.45	0.052	0.53
437.85	0.085	0.674
426.2	0.118	0.79
406.65	0.205	0.901
398.65	0.25	0.931
381.6	0.407	0.971
378.5	0.455	0.977
370.4	0.57	0.986
365.3	0.673	0.992
363.45	0.707	0.993
360.55	0.775	0.995
357.3	0.87	0.998
355.3	0.933	0.999
Gupta, S.K. - Rawat, B.S. - Goswami, A.N. - Nanoti, S.M. - Krishna, R., Isobaric vapour—liquid equilibria of the systems: Benzene—triethylene glycol, toluene—triethylene glycol and benzene—N-methylpyrrolidone, Fluid Phase Equilibria. 46 (1989) 95-102.
https://doi.org/10.1016/0378-3812(89)80278-X
P / bar =	1.0133				Chart (double-click image to zoom in)
T / K	x₁	y₁
420.05	0.1217	0.8242
413.35	0.1514	0.865
397.75	0.236	0.928
383.15	0.366	0.9658
377.05	0.455	0.976
371.45	0.5493	0.984
365.75	0.6634	0.9902
361.95	0.7471	0.9935
358.85	0.8335	0.9961
355.85	0.9173	0.9982
Property change of mixing data
Enthalpy of mixing
Letcher, T.M. - Naicker, P.K., Excess molar enthalpies and excess molar volumes of mixtures containingN-methyl-2-pyrrolidinone and an aromatic hydrocarbon atT= 298.15 K andp= 0.101325 MPa, The Journal of Chemical Thermodynamics. 31 (1999) 1585-1595.
https://doi.org/10.1006/jcht.1999.0555
T / K =	298.15				Chart (double-click image to zoom in)
P / bar =	1.01
hᴹ / J.mol⁻¹	z₁
-237.2	0.156
-358.6	0.239
-443	0.307
-471.4	0.342
-540.1	0.486
-546.4	0.516
-544.1	0.531
-540.5	0.548
-533	0.585
-469	0.688
-387.1	0.777
-365.1	0.79
Chhikara, Yameeka - Yadav, J.S. - Sharma, Dimple - Sharma, V.K., Thermodynamic and topological investigations of molecular interactions in binary and ternary mixtures containing 1-methyl pyrrolidin-2-one at T=308.15K, The Journal of Chemical Thermodynamics. 43 (2011) 737-749.
https://doi.org/10.1016/j.jct.2010.12.016
T / K =	308.15				Chart (double-click image to zoom in)
P / bar =	UNKNOWN (1.0132)
hᴹ / J.mol⁻¹	x₁
-125.9	0.9375
-304.4	0.8212
-368.4	0.7644
-402.9	0.7264
-452.6	0.6538
-485.8	0.5638
-494.3	0.4533
-492.3	0.4459
-467.2	0.3757
-442.1	0.3319
-384.1	0.2589
-298.2	0.1837
-222.6	0.1281
-129.3	0.0689
Gmehling, J. - Meents, B., Excess enthalpy. 1-​Methyl-​2-​pyrrolidinone - benzene system, Int. Data Ser. Sel. Data Mixtures Ser. A. (1992)
T / K =	363.15				Chart (double-click image to zoom in)
P / bar =	7
hᴹ / J.mol⁻¹	z₁
-86.269	0.054
-163.48	0.1076
-231.14	0.1607
-295.81	0.2134
-293.42	0.2134
-390.52	0.3174
-452.18	0.4197
-469.33	0.5204
-442.84	0.6194
-374.02	0.7169
-267.65	0.8127
-198.96	0.8601
-130.23	0.9071
-94.792	0.9305

## Sheet: 706_1748
Name	1,2,3,4-TETRAHYDRONAPHTHALENE		QUINOLINE
CAS	119-64-2		91-22-5
Critical temperature / K	720		782.15
Critical pressure / bar	36.5		48.6
Acentric factor	0.335		0.346
	Source: DIPPR May 2017
Phase equilibrium data
Isothermal phase equilibrium data
Niesen, Vicki G. - Yesavage, Victor F., Vapor-liquid equilibria for m-cresol/tetralin and tetralin/quinoline at temperatures between 523 and 598 K, Journal of Chemical & Engineering Data. 33 (1988) 253-258.
https://doi.org/10.1021/je00053a009
T / K =	523.15				Chart (double-click image to zoom in)
P / bar	x₁	y₁
1.407	0.041	0.087
1.51	0.102	0.188
1.613	0.18	0.304
2.235	0.691	0.785
2.356	0.826	0.879
2.388	0.888	0.924
Niesen, Vicki G. - Yesavage, Victor F., Vapor-liquid equilibria for m-cresol/tetralin and tetralin/quinoline at temperatures between 523 and 598 K, Journal of Chemical & Engineering Data. 33 (1988) 253-258.
https://doi.org/10.1021/je00053a009
T / K =	548.15				Chart (double-click image to zoom in)
P / bar	x₁	y₁
2.296	0.036	0.074
2.434	0.099	0.177
2.647	0.187	0.304
2.86	0.305	0.442
3.138	0.447	0.58
3.372	0.583	0.692
3.534	0.689	0.779
3.697	0.817	0.872
3.798	0.905	0.932
Niesen, Vicki G. - Yesavage, Victor F., Vapor-liquid equilibria for m-cresol/tetralin and tetralin/quinoline at temperatures between 523 and 598 K, Journal of Chemical & Engineering Data. 33 (1988) 253-258.
https://doi.org/10.1021/je00053a009
T / K =	573.15				Chart (double-click image to zoom in)
P / bar	x₁	y₁
3.554	0.032	0.056
3.731	0.079	0.137
3.939	0.146	0.236
4.167	0.22	0.331
4.479	0.332	0.454
4.747	0.437	0.546
5.017	0.551	0.662
5.226	0.654	0.741
5.444	0.76	0.821
5.715	0.913	0.936
Niesen, Vicki G. - Yesavage, Victor F., Vapor-liquid equilibria for m-cresol/tetralin and tetralin/quinoline at temperatures between 523 and 598 K, Journal of Chemical & Engineering Data. 33 (1988) 253-258.
https://doi.org/10.1021/je00053a009
T / K =	598.15				Chart (double-click image to zoom in)
P / bar	x₁	y₁
5.534	0.075	0.123
5.842	0.143	0.224
6.163	0.222	0.319
6.568	0.328	0.442
6.918	0.43	0.539
7.235	0.537	0.633
7.626	0.656	0.733
7.898	0.759	0.815
8.266	0.916	0.936
Mahmood, Shaukat - Zhao, Qingwen - Kabadi, Vinayak N., High-Temperature VLE for the Tetralin−Quinoline System, Journal of Chemical & Engineering Data. 46 (2001) 994-999.
https://doi.org/10.1021/je000069m
T / K =	623.15				Chart (double-click image to zoom in)
P / bar	x₁	y₁
7.94	0.057	0.086
10.2	0.525	0.611
10.92	0.7	0.763
Mahmood, Shaukat - Zhao, Qingwen - Kabadi, Vinayak N., High-Temperature VLE for the Tetralin−Quinoline System, Journal of Chemical & Engineering Data. 46 (2001) 994-999.
https://doi.org/10.1021/je000069m
T / K =	643.15				Chart (double-click image to zoom in)
P / bar	x₁	y₁
10.4	0.057	0.08
13.15	0.53	0.605
13.92	0.685	0.743

## Sheet: 905_909
Name	NITROGEN		CARBON DIOXIDE
CAS	7727-37-9		124-38-9
Critical temperature / K	126.2		304.21
Critical pressure / bar	34		73.83
Acentric factor	0.038		0.224
	Source: DIPPR May 2017
Phase equilibrium data
Isothermal phase equilibrium data
Brown, T.S. - Sloan, E.D. - Kidnay, A.J., Vapor-liquid equilibria in the nitrogen + carbon dioxide + ethane system, Fluid Phase Equilibria. 51 (1989) 299-313.
https://doi.org/10.1016/0378-3812(89)80372-3
T / K =	220				Chart (double-click image to zoom in)
P / bar	x₁	y₁
13.73	0.0108	0.5174
24.57	0.0269	0.6971
59.93	0.083	0.815
74.85	0.1092	0.8262
90.98	0.1338	0.8264
119.95	0.1903	0.808
Al-Sahhaf, Taher A. - Kidnay, Arthur J. - Sloan, E. Dendy, Liquid + vapor equilibriums in the nitrogen + carbon dioxide + methane system, Industrial & Engineering Chemistry Fundamentals. 22 (1983) 372-380.
https://doi.org/10.1021/i100012a004
T / K =	220				Chart (double-click image to zoom in)
P / bar	x₁	y₁
15.09	0.0132	0.5518
30.75	0.0362	0.7423
45.95	0.0601	0.7974
63.13	0.0883	0.8214
82.58	0.1209	0.8281
111.14	0.1742	0.8165
124.32	0.2016	0.8028
137.96	0.2324	0.7869
155.06	0.2771	0.7516
167.06	0.3155	0.7215
Zhang Zhanzhu - Guo Liping - Yang Xiadong - Knapp, H., Vapor And Liquid Equilibrium For Nitrogen - Ethane - Carbon Dioxide Ternary System, Huagong Xuebao. 50 (1999) 392-398.
T / K =	220				Chart (double-click image to zoom in)
P / bar	x₁	y₁
20	0.0209	0.6487
30	0.0363	0.7404
40	0.0515	0.7824
50	0.0731	0.8061
Yucelen, Belgin - Kidnay, Arthur J., Vapor−Liquid Equilibria in the Nitrogen + Carbon Dioxide + Propane System from 240 to 330 K at Pressures to 15 MPa, Journal of Chemical & Engineering Data. 44 (1999) 926-931.
https://doi.org/10.1021/je980321e
T / K =	240				Chart (double-click image to zoom in)
P / bar	x₁	y₁
20	0.013	0.3186
109.3	0.183	0.6977
130	0.2467	0.6692
Al-Sahhaf, Taher A. - Kidnay, Arthur J. - Sloan, E. Dendy, Liquid + vapor equilibriums in the nitrogen + carbon dioxide + methane system, Industrial & Engineering Chemistry Fundamentals. 22 (1983) 372-380.
https://doi.org/10.1021/i100012a004
T / K =	240				Chart (double-click image to zoom in)
P / bar	x₁	y₁
21	0.0129	0.3312
32.08	0.0307	0.5151
40.89	0.0454	0.589
56.74	0.0734	0.6572
62.62	0.0838	0.671
72.35	0.1022	0.6873
85.9	0.1297	0.6981
99.45	0.1592	0.6992
107.28	0.1775	0.696
114.66	0.1958	0.6897
122.25	0.2165	0.6806
126.59	0.2296	0.6745
138.65	0.2696	0.6517
144.72	0.2944	0.6288
154.24	0.3491	0.5929
157.68	0.3816	0.5633
161.47	0.4777	0.5202
Brown, T. S. - Sloan, E. D. - Kidnay, A. J., Vapor-liquid equilibria for the ternary system N2 + CO2 +n-C4H10 at 250 and 270 K1, International Journal of Thermophysics. 15 (1994) 1211-1219.
https://doi.org/10.1007/BF01458829
T / K =	250				Chart (double-click image to zoom in)
P / bar	x₁	y₁
60.03	0.0755	0.5652
119.97	0.2192	0.605
139.93	0.298	0.547
Brown, T.S. - Niesen, V.G. - Sloan, E.D. - Kidnay, A.J., Vapor-liquid equilibria for the binary systems of nitrogen, carbon dioxide, and n-butane at temperatures from 220 to 344 K., Fluid Phase Equilibria. 53 (1989) 7-14.
https://doi.org/10.1016/0378-3812(89)80067-6
T / K =	250				Chart (double-click image to zoom in)
P / bar	x₁	y₁
25.99	0.0136	0.2561
36.88	0.0331	0.4239
44.89	0.0488	0.5001
55.41	0.0664	0.5494
65.97	0.087	0.5849
75.32	0.1069	0.6049
96.32	0.1532	0.6223
111.51	0.1931	0.6163
119.36	0.2173	0.6063
134.16	0.2708	0.5727
140.66	0.3008	0.5437
Al-Sahhaf, Taher A., Vapor—liquid equilibria for the ternary system N2 + CO2 + CH4 at 230 and 250 K, Fluid Phase Equilibria. 55 (1990) 159-172.
https://doi.org/10.1016/0378-3812(90)85010-8
T / K =	250				Chart (double-click image to zoom in)
P / bar	x₁	y₁
89.63	0.1394	0.6142
103.42	0.1767	0.6162
Brown, T.S. - Niesen, V.G. - Sloan, E.D. - Kidnay, A.J., Vapor-liquid equilibria for the binary systems of nitrogen, carbon dioxide, and n-butane at temperatures from 220 to 344 K., Fluid Phase Equilibria. 53 (1989) 7-14.
https://doi.org/10.1016/0378-3812(89)80067-6
T / K =	270				Chart (double-click image to zoom in)
P / bar	x₁	y₁
48.57	0.0316	0.2423
60.84	0.0561	0.3309
76.5	0.0901	0.3942
91.02	0.1279	0.4205
Brown, T.S. - Sloan, E.D. - Kidnay, A.J., Vapor-liquid equilibria in the nitrogen + carbon dioxide + ethane system, Fluid Phase Equilibria. 51 (1989) 299-313.
https://doi.org/10.1016/0378-3812(89)80372-3
T / K =	270				Chart (double-click image to zoom in)
P / bar	x₁	y₁
57.79	0.0498	0.3087
61.82	0.0566	0.3322
71.65	0.077	0.3747
75.46	0.0861	0.3879
82.89	0.1055	0.4049
84.76	0.109	0.4095
90.01	0.123	0.4148
95.86	0.1338	0.4186
101.93	0.1572	0.4192
Yucelen, Belgin - Kidnay, Arthur J., Vapor−Liquid Equilibria in the Nitrogen + Carbon Dioxide + Propane System from 240 to 330 K at Pressures to 15 MPa, Journal of Chemical & Engineering Data. 44 (1999) 926-931.
https://doi.org/10.1021/je980321e
T / K =	270				Chart (double-click image to zoom in)
P / bar	x₁	y₁
35.67	0.0064	0.0759
37.19	0.0088	0.1036
50.76	0.0358	0.2629
60	0.053	0.325
119.7	0.2456	0.3822
Somait, Fahad A. - Kidnay, Arthur J., Liquid-vapor equilibriums at 270.00 K for systems containing nitrogen, methane, and carbon dioxide, Journal of Chemical & Engineering Data. 23 (1978) 301-305.
https://doi.org/10.1021/je60079a019
T / K =	270				Chart (double-click image to zoom in)
P / bar	x₁	y₁
34.248	0.004	0.0472
36.274	0.0078	0.0851
37.997	0.0108	0.114
39.517	0.0135	0.1331
41.219	0.0168	0.1598
42.05	0.0182	0.1683
42.81	0.0197	0.1783
45.596	0.025	0.2115
45.9	0.0263	0.2156
47.603	0.0289	0.2323
47.744	0.0292	0.2325
51.524	0.0368	0.2674
56.985	0.0476	0.3069
60.491	0.0545	0.328
60.795	0.056	0.329
64.443	0.063	0.3473
70.928	0.0778	0.377
77.21	0.0921	0.3961
83.796	0.108	0.4126
86.126	0.1142	0.4139
86.126	0.1142	0.4139
89.825	0.1231	0.419
92.915	0.1319	0.4173
96.259	0.143	0.421
96.259	0.143	0.421
102.04	0.1585	0.4188
107.14	0.1769	0.4134
110.53	0.1904	0.4094
111.46	0.195	0.408
112.52	0.1986	0.4061
115.49	0.2142	0.3986
119.48	0.2486	0.3762
120.24	0.2454	0.372
120.73	0.2505	0.3664
121.35	0.2556	0.364
123.41	0.353	0.353	CRIT
Yorizane, M. - Yoshimura, S. - Masuoka, H., Vapor liquid equilibrium at high pressures. N2-​CO2, H2-​CO2 systems, Kagaku Kogaku. 34 (1970) 953-957.
https://doi.org/10.1252/kakoronbunshu1953.34.953
T / K =	273.15				Chart (double-click image to zoom in)
P / bar	x₁	y₁
40.53	0.011	0.091
50.66	0.031	0.215
60.8	0.051	0.3
70.93	0.071	0.347
91.19	0.126	0.392
101.33	0.158	0.397
111.46	0.2	0.39
116.52	0.251	0.356
117.54	0.272	0.338
118.25	0.297	0.297	CRIT
Zenner, G.H. - Dana, L.I., Liquid-​vapor equilibrium compositions of carbon dioxideoxygen-​nitrogen mixtures, Chem. Eng. Progr. Symp. Ser. 59 (1963) 36-41.
T / K =	273.15				Chart (double-click image to zoom in)
P / bar	x₁	y₁
48.332	0.0265	0.198
60.288	0.0512	0.292
60.389	0.0521	0.2885
63.125	0.058	0.31
79.945	0.0952	0.373
95.853	0.1408	0.396
109.73	0.1923	0.3845
116.62	0.228	0.354
118.55	0.2975	0.3045
Kaminishi, G.I. - Toriumi, T., Gas-​liquid equilibrium under high pressures. VI. Vapor-​liquid phase equilibrium in the CO2-​H2, CO2-​N2, and CO2-​O2 systems, Kogyo Kagaku Zasshi. 69 (1966) 175-178.
T / K =	288.15				Chart (double-click image to zoom in)
P / bar	x₁	y₁
74.17	0.051	0.175
84.404	0.083	0.202
Krichevskii, I.R. - Khazanova, N.E. - Lesnevskaya, L.S. - Sandalova, L.Yu., Liquid-​gas equilibrium in the nitrogen-​carbon dioxide system under elevated pressures, Khim. Promst. Moscow. (1962) 169-171.
T / K =	288.15				Chart (double-click image to zoom in)
P / bar	x₁	y₁
60.795	0.025	0.09
70.928	0.05	0.158
81.06	0.074	0.195
91.193	0.102	0.21
101.33	0.161	0.205
103.35	0.187	0.187	CRIT
Xu, Nanping - Dong, Junhang - Wang, Yanru - Shi, Jun, High pressure vapor liquid equilibria at 293 K for systems containing nitrogen, methane and carbon dioxide, Fluid Phase Equilibria. 81 (1992) 175-186.
https://doi.org/10.1016/0378-3812(92)85150-7
T / K =	293.3				Chart (double-click image to zoom in)
P / bar	x₁	y₁
60	0.005	0.023
69.8	0.029	0.088
74.2	0.041	0.111
81	0.061	0.136
87	0.076	0.137
89	0.086	0.133
90.3	0.096	0.129
91.1	0.116	0.116	CRIT
Bian, Baigui - Wang, Yanru - Shi, Jun - Zhao, Ensheng - Lu, Benjamin C.-Y., Simultaneous determination of vapor-liquid equilibrium and molar volumes for coexisting phases up to the critical temperature with a static method, Fluid Phase Equilibria. 90 (1993) 177-187.
https://doi.org/10.1016/0378-3812(93)85012-B
T / K =	301.3				Chart (double-click image to zoom in)
P / bar	x₁	y₁
72.2	0.0069	0.0152
73.3	0.0101	0.0206
76.1	0.0182	0.0326
79	0.0258	0.039
80.1	0.0348	0.0389
80.5	0.0379	0.0379	CRIT
Property change of mixing data
Enthalpy of mixing
Lee, Jong Il - Mather, Alan E., Excess enthalpy of gaseous mixtures of nitrogen and carbon dioxide, Journal of Chemical & Engineering Data. 17 (1972) 189-192.
https://doi.org/10.1021/je60053a042
T / K =	283.15				Chart (double-click image to zoom in)
P / bar =	10.13
hᴹ / J.mol⁻¹	z₁
21	0.1
37	0.2
47	0.3
54	0.4
59	0.5
53	0.6
44	0.7
34	0.8
18	0.9
Lee, Jong Il - Mather, Alan E., Excess enthalpy of gaseous mixtures of nitrogen and carbon dioxide, Journal of Chemical & Engineering Data. 17 (1972) 189-192.
https://doi.org/10.1021/je60053a042
T / K =	283.15				Chart (double-click image to zoom in)
P / bar =	43.57
hᴹ / J.mol⁻¹	z₁
400	0.1
530	0.2
602	0.3
620	0.4
594	0.5
543	0.6
450	0.7
335	0.8
190	0.9
Lee, Jong Il - Mather, Alan E., Excess enthalpy of gaseous mixtures of nitrogen and carbon dioxide, Journal of Chemical & Engineering Data. 17 (1972) 189-192.
https://doi.org/10.1021/je60053a042
T / K =	293.15				Chart (double-click image to zoom in)
P / bar =	40.53
hᴹ / J.mol⁻¹	z₁
185	0.1
286	0.2
346	0.3
371	0.4
363	0.5
328	0.6
270	0.7
205	0.8
112	0.9
Lee, Jong Il - Mather, Alan E., Excess enthalpy of gaseous mixtures of nitrogen and carbon dioxide, Journal of Chemical & Engineering Data. 17 (1972) 189-192.
https://doi.org/10.1021/je60053a042
T / K =	305.15				Chart (double-click image to zoom in)
P / bar =	10.13
hᴹ / J.mol⁻¹	z₁
16	0.1
30	0.2
39	0.3
44	0.4
47	0.5
43	0.6
35	0.7
26	0.8
16	0.9
Lee, Jong Il - Mather, Alan E., Excess enthalpy of gaseous mixtures of nitrogen and carbon dioxide, Journal of Chemical & Engineering Data. 17 (1972) 189-192.
https://doi.org/10.1021/je60053a042
T / K =	305.15				Chart (double-click image to zoom in)
P / bar =	50.66
hᴹ / J.mol⁻¹	z₁
234	0.1
389	0.2
452	0.3
460	0.4
439	0.5
396	0.6
329	0.7
240	0.8
133	0.9
Lee, Jong Il - Mather, Alan E., Excess enthalpy of gaseous mixtures of nitrogen and carbon dioxide, Journal of Chemical & Engineering Data. 17 (1972) 189-192.
https://doi.org/10.1021/je60053a042
T / K =	305.15				Chart (double-click image to zoom in)
P / bar =	86.13
hᴹ / J.mol⁻¹	z₁
3980	0.1
4340	0.2
4170	0.3
3740	0.4
3240	0.5
2705	0.6
2085	0.7
1405	0.8
725	0.9
Hejmadi, Arun V. - Katz, Donald L. - Powers, John E., Experimental determination of the enthalpy of mixing of N + CO2 under pressure, The Journal of Chemical Thermodynamics. 3 (1971) 483-496.
https://doi.org/10.1016/S0021-9614(71)80030-7
T / K =	313.15				Chart (double-click image to zoom in)
P / bar =	65.49
hᴹ / J.mol⁻¹	z₁
627.2	0.22
705.5	0.358
662.7	0.516
444	0.732
Lee, Jong Il - Mather, Alan E., Excess enthalpy of gaseous mixtures of nitrogen and carbon dioxide, Journal of Chemical & Engineering Data. 17 (1972) 189-192.
https://doi.org/10.1021/je60053a042
T / K =	313.15				Chart (double-click image to zoom in)
P / bar =	40.53
hᴹ / J.mol⁻¹	z₁
111	0.1
187	0.2
235	0.3
256	0.4
255	0.5
230	0.6
189	0.7
130	0.8
69	0.9
Lee, Jong Il - Mather, Alan E., Excess enthalpy of gaseous mixtures of nitrogen and carbon dioxide, Journal of Chemical & Engineering Data. 17 (1972) 189-192.
https://doi.org/10.1021/je60053a042
T / K =	313.15				Chart (double-click image to zoom in)
P / bar =	81.06
hᴹ / J.mol⁻¹	z₁
1021	0.1
1292	0.2
1416	0.3
1370	0.4
1243	0.5
1097	0.6
904	0.7
668	0.8
364	0.9
Lee, Jong Il - Mather, Alan E., Excess enthalpy of gaseous mixtures of nitrogen and carbon dioxide, Journal of Chemical & Engineering Data. 17 (1972) 189-192.
https://doi.org/10.1021/je60053a042
T / K =	313.15				Chart (double-click image to zoom in)
P / bar =	121.59
hᴹ / J.mol⁻¹	z₁
1883	0.1
2940	0.2
3291	0.3
3244	0.4
2879	0.5
2391	0.6
1787	0.7
1138	0.8
541	0.9
Lee, Jong Il - Mather, Alan E., Excess enthalpy of gaseous mixtures of nitrogen and carbon dioxide, Journal of Chemical & Engineering Data. 17 (1972) 189-192.
https://doi.org/10.1021/je60053a042
T / K =	323.15				Chart (double-click image to zoom in)
P / bar =	40.53
hᴹ / J.mol⁻¹	z₁
93	0.1
156	0.2
200	0.3
225	0.4
220	0.5
195	0.6
160	0.7
115	0.8
60	0.9
Lee, Jong Il - Mather, Alan E., Excess enthalpy of gaseous mixtures of nitrogen and carbon dioxide, Journal of Chemical & Engineering Data. 17 (1972) 189-192.
https://doi.org/10.1021/je60053a042
T / K =	323.15				Chart (double-click image to zoom in)
P / bar =	81.06
hᴹ / J.mol⁻¹	z₁
490	0.1
720	0.2
870	0.3
890	0.4
845	0.5
760	0.6
620	0.7
465	0.8
257	0.9
Lee, Jong Il - Mather, Alan E., Excess enthalpy of gaseous mixtures of nitrogen and carbon dioxide, Journal of Chemical & Engineering Data. 17 (1972) 189-192.
https://doi.org/10.1021/je60053a042
T / K =	333.15				Chart (double-click image to zoom in)
P / bar =	20.26
hᴹ / J.mol⁻¹	z₁
29	0.1
48	0.2
66	0.3
76	0.4
79	0.5
76	0.6
62	0.7
45	0.8
23	0.9
Lee, Jong Il - Mather, Alan E., Excess enthalpy of gaseous mixtures of nitrogen and carbon dioxide, Journal of Chemical & Engineering Data. 17 (1972) 189-192.
https://doi.org/10.1021/je60053a042
T / K =	333.15				Chart (double-click image to zoom in)
P / bar =	60.79
hᴹ / J.mol⁻¹	z₁
171	0.1
272	0.2
340	0.3
370	0.4
360	0.5
325	0.6
275	0.7
200	0.8
115	0.9
Lee, Jong Il - Mather, Alan E., Excess enthalpy of gaseous mixtures of nitrogen and carbon dioxide, Journal of Chemical & Engineering Data. 17 (1972) 189-192.
https://doi.org/10.1021/je60053a042
T / K =	333.15				Chart (double-click image to zoom in)
P / bar =	101.32
hᴹ / J.mol⁻¹	z₁
712	0.1
1042	0.2
1190	0.3
1210	0.4
1100	0.5
955	0.6
780	0.7
556	0.8
295	0.9
Lee, Jong Il - Mather, Alan E., Excess enthalpy of gaseous mixtures of nitrogen and carbon dioxide, Journal of Chemical & Engineering Data. 17 (1972) 189-192.
https://doi.org/10.1021/je60053a042
T / K =	343.15				Chart (double-click image to zoom in)
P / bar =	30.4
hᴹ / J.mol⁻¹	z₁
44	0.1
76	0.2
100	0.3
113	0.4
115	0.5
110	0.6
92	0.7
68	0.8
37	0.9
Lee, Jong Il - Mather, Alan E., Excess enthalpy of gaseous mixtures of nitrogen and carbon dioxide, Journal of Chemical & Engineering Data. 17 (1972) 189-192.
https://doi.org/10.1021/je60053a042
T / K =	343.15				Chart (double-click image to zoom in)
P / bar =	70.93
hᴹ / J.mol⁻¹	z₁
187	0.1
310	0.2
380	0.3
415	0.4
400	0.5
350	0.6
290	0.7
215	0.8
115	0.9
Lee, Jong Il - Mather, Alan E., Excess enthalpy of gaseous mixtures of nitrogen and carbon dioxide, Journal of Chemical & Engineering Data. 17 (1972) 189-192.
https://doi.org/10.1021/je60053a042
T / K =	353.15				Chart (double-click image to zoom in)
P / bar =	10.13
hᴹ / J.mol⁻¹	z₁
9	0.1
18	0.2
24	0.3
30	0.4
32	0.5
30	0.6
24	0.7
18	0.8
9	0.9
Lee, Jong Il - Mather, Alan E., Excess enthalpy of gaseous mixtures of nitrogen and carbon dioxide, Journal of Chemical & Engineering Data. 17 (1972) 189-192.
https://doi.org/10.1021/je60053a042
T / K =	353.15				Chart (double-click image to zoom in)
P / bar =	50.66
hᴹ / J.mol⁻¹	z₁
82	0.1
135	0.2
176	0.3
198	0.4
203	0.5
190	0.6
164	0.7
125	0.8
67	0.9
Lee, Jong Il - Mather, Alan E., Excess enthalpy of gaseous mixtures of nitrogen and carbon dioxide, Journal of Chemical & Engineering Data. 17 (1972) 189-192.
https://doi.org/10.1021/je60053a042
T / K =	353.15				Chart (double-click image to zoom in)
P / bar =	91.19
hᴹ / J.mol⁻¹	z₁
262	0.1
412	0.2
500	0.3
540	0.4
530	0.5
470	0.6
390	0.7
285	0.8
156	0.9
Additional data with unitary variance
Critical point					Chart (double-click image to zoom in)
Arai, Yasuhiko - Kaminishi, Gen-Ichi - Saito, Shozaburo, The Experimental Determination Of The P-V-T-X Relations For The Carbon Dioxide-Nitrogen And The Carbon Dioxide-Methane Systems, Journal of Chemical Engineering of Japan. 4 (1971) 113-122.
https://doi.org/10.1252/jcej.4.113
T / K	P / bar	x₁
253.15	144.39	0.395
Krichevskii, I.R. - Khazanova, N.E. - Lesnevskaya, L.S. - Sandalova, L.Yu., Liquid-​gas equilibrium in the nitrogen-​carbon dioxide system under elevated pressures, Khim. Promst. Moscow. (1962) 169-171.
T / K	P / bar	x₁
293.15	98.792	0.14
298.15	92.206	0.093
301.15	87.14	0.064

## Sheet: 909_2
Name	CARBON DIOXIDE		ETHANE
CAS	124-38-9		74-84-0
Critical temperature / K	304.21		305.32
Critical pressure / bar	73.83		48.72
Acentric factor	0.224		0.099
	Source: DIPPR May 2017
Phase equilibrium data
Isothermal phase equilibrium data
Wei, Michael S.-W. - Brown, Trent S. - Kidnay, Arthur J. - Sloan, E. Dendy, Vapor + Liquid Equilibria for the Ternary System Methane + Ethane + Carbon Dioxide at 230 K and Its Constituent Binaries at Temperatures from 207 to 270 K, Journal of Chemical & Engineering Data. 40 (1995) 726-731.
https://doi.org/10.1021/je00020a002
T / K =	207				Chart (double-click image to zoom in)
P / bar	x₁	y₁
4.71	0.3738	0.5104
4.65	0.3364	0.4937
4.62	0.3111	0.4786
4.61	0.3028	0.4759
4.59	0.2923	0.4699
4.56	0.2744	0.4592
4.44	0.2285	0.4292
4.19	0.1638	0.3714
3.72	0.0778	0.2624
Wei, Michael S.-W. - Brown, Trent S. - Kidnay, Arthur J. - Sloan, E. Dendy, Vapor + Liquid Equilibria for the Ternary System Methane + Ethane + Carbon Dioxide at 230 K and Its Constituent Binaries at Temperatures from 207 to 270 K, Journal of Chemical & Engineering Data. 40 (1995) 726-731.
https://doi.org/10.1021/je00020a002
T / K =	210				Chart (double-click image to zoom in)
P / bar	x₁	y₁
5.38	0.7093	0.6213
5.4	0.6963	0.6172
5.41	0.6844	0.6149
5.43	0.6651	0.6097
5.45	0.6566	0.6053
5.46	0.615	0.5924
5.47	0.5572	0.5698
5.45	0.4965	0.5506
5.41	0.4316	0.5288
5.39	0.4093	0.5203
5.37	0.3842	0.5129
5.22	0.2961	0.4737
4.98	0.2153	0.4185
4.54	0.1254	0.3194
4.26	0.0877	0.2571
3.8	0.0358	0.1322
Wei, Michael S.-W. - Brown, Trent S. - Kidnay, Arthur J. - Sloan, E. Dendy, Vapor + Liquid Equilibria for the Ternary System Methane + Ethane + Carbon Dioxide at 230 K and Its Constituent Binaries at Temperatures from 207 to 270 K, Journal of Chemical & Engineering Data. 40 (1995) 726-731.
https://doi.org/10.1021/je00020a002
T / K =	213				Chart (double-click image to zoom in)
P / bar	x₁	y₁
5.64	0.8678	0.7327
5.76	0.8317	0.7055
5.94	0.7601	0.6588
6.04	0.6982	0.6319
6.1	0.6503	0.6022
6.13	0.6089	0.5911
6.16	0.5557	0.58
6.13	0.4789	0.5531
6.07	0.4282	0.5302
5.83	0.3075	0.477
5.32	0.1706	0.3725
5.08	0.1306	0.3185
4.71	0.0837	0.2401
4.32	0.0442	0.1458
Brown, T.S. - Kidnay, A.J. - Sloan, E.D., Vapor—liquid equilibria in the carbon dioxide-ethane system, Fluid Phase Equilibria. 40 (1988) 169-184.
https://doi.org/10.1016/0378-3812(88)80028-1
T / K =	220				Chart (double-click image to zoom in)
P / bar	x₁	y₁
5.22	0.015	0.0706
5.48	0.0317	0.1239
5.79	0.0532	0.1846
6.13	0.0812	0.2418
6.6	0.1332	0.3178
6.86	0.1608	0.3592
7.2	0.2186	0.412
7.42	0.2564	0.4454
7.65	0.319	0.485
7.8	0.3693	0.5114
7.96	0.4631	0.5518
8.03	0.5641	0.5866
8.02	0.6552	0.6186
7.88	0.7782	0.6692
7.63	0.8572	0.7195
7.36	0.9035	0.7668
7	0.9428	0.8247
6.54	0.9772	0.9006
Brown, T.S. - Kidnay, A.J. - Sloan, E.D., Vapor—liquid equilibria in the carbon dioxide-ethane system, Fluid Phase Equilibria. 40 (1988) 169-184.
https://doi.org/10.1016/0378-3812(88)80028-1
T / K =	230				Chart (double-click image to zoom in)
P / bar	x₁	y₁
7.99	0.0485	0.1513
8.33	0.0681	0.191
8.41	0.0745	0.1982
8.83	0.1035	0.2452
8.95	0.1106	0.267
9.21	0.128	0.2862
9.48	0.1548	0.3225
9.65	0.1712	0.3482
10.38	0.2538	0.428
10.8	0.33	0.4782
10.98	0.3605	0.5022
11.12	0.4092	0.5227
11.22	0.4422	0.5402
11.38	0.5195	0.575
11.45	0.6844	0.6484
11	0.8438	0.7403
10.23	0.9326	0.8389
9.36	0.9828	0.9451
Wallis, Kevin P - Clancy, Paulette - Zollweg, John A - Streett, William B, Excess thermodynamic properties for {xCO2 + (1 − x)C2H6} (I): experiment and theory, The Journal of Chemical Thermodynamics. 16 (1984) 811-823.
https://doi.org/10.1016/0021-9614(84)90028-4
T / K =	243.15				Chart (double-click image to zoom in)
P / bar	x₁	y₁
11.558	0.033	0.096
12.439	0.071	0.177
14.141	0.166	0.316
15.336	0.253	0.41
16.38	0.376	0.5
17.068	0.504	0.573
17.291	0.576	0.61
17.291	0.723	0.691
16.734	0.844	0.776
15.458	0.948	0.894
Brown, T.S. - Kidnay, A.J. - Sloan, E.D., Vapor—liquid equilibria in the carbon dioxide-ethane system, Fluid Phase Equilibria. 40 (1988) 169-184.
https://doi.org/10.1016/0378-3812(88)80028-1
T / K =	250				Chart (double-click image to zoom in)
P / bar	x₁	y₁
14.35	0.0424	0.1092
14.82	0.0571	0.1442
15.5	0.0865	0.1944
15.76	0.0974	0.2109
16.49	0.128	0.2576
16.92	0.1489	0.2885
17.5	0.1783	0.3216
18.67	0.2501	0.3988
19.73	0.3373	0.4688
20.22	0.3884	0.5023
20.24	0.3922	0.5038
20.81	0.4754	0.5561
21	0.517	0.5807
21.1	0.5344	0.593
21.16	0.5525	0.6001
21.2	0.572	0.6107
21.28	0.6046	0.6287
21.34	0.6583	0.6583	AZEO
21.34	0.6601	0.6589
20.82	0.8279	0.7685
19.91	0.9048	0.8497
19.05	0.9589	0.917
18.21	0.9891	0.979
Wallis, Kevin P - Clancy, Paulette - Zollweg, John A - Streett, William B, Excess thermodynamic properties for {xCO2 + (1 − x)C2H6} (I): experiment and theory, The Journal of Chemical Thermodynamics. 16 (1984) 811-823.
https://doi.org/10.1016/0021-9614(84)90028-4
T / K =	263.15				Chart (double-click image to zoom in)
P / bar	x₁	y₁
20.178	0.045	0.104
24.109	0.165	0.286
26.6	0.273	0.397
27.796	0.339	0.453
28.951	0.425	0.514
30.075	0.548	0.596
30.5	0.654	0.666
30.46	0.69	0.69	AZEO
30.278	0.773	0.745
29.599	0.858	0.816
28.231	0.937	0.9
Brown, T.S. - Kidnay, A.J. - Sloan, E.D., Vapor—liquid equilibria in the carbon dioxide-ethane system, Fluid Phase Equilibria. 40 (1988) 169-184.
https://doi.org/10.1016/0378-3812(88)80028-1
T / K =	270				Chart (double-click image to zoom in)
P / bar	x₁	y₁
24.34	0.0517	0.1056
25.72	0.0858	0.1641
26.35	0.1036	0.1898
27.34	0.1332	0.2297
28.7	0.1751	0.2824
29.76	0.2116	0.3227
30.83	0.2527	0.3632
31.81	0.2931	0.4014
32.65	0.3328	0.4362
33.6	0.3819	0.4751
35.19	0.4967	0.5594
35.81	0.5616	0.6036
36.1	0.6076	0.636
36.36	0.6893	0.6914
36.36	0.6925	0.6925	AZEO
36.27	0.7392	0.7261
36.21	0.769	0.7494
36.13	0.7783	0.755
35.85	0.8182	0.7864
34.86	0.894	0.8608
34.49	0.9142	0.8788
34.16	0.9328	0.9002
32.82	0.9797	0.9645
Wei, Michael S.-W. - Brown, Trent S. - Kidnay, Arthur J. - Sloan, E. Dendy, Vapor + Liquid Equilibria for the Ternary System Methane + Ethane + Carbon Dioxide at 230 K and Its Constituent Binaries at Temperatures from 207 to 270 K, Journal of Chemical & Engineering Data. 40 (1995) 726-731.
https://doi.org/10.1021/je00020a002
T / K =	270				Chart (double-click image to zoom in)
P / bar	x₁	y₁
33.44	0.9642	0.9337
35.67	0.8418	0.8095
31.51	0.2907	0.4116
27.97	0.1568	0.2689
25.43	0.0801	0.1633
Ohgaki, Kazunari - Katayama, Takashi, Isothermal vapor-liquid equilibrium data for the ethane—carbon dioxide system at high pressures, Fluid Phase Equilibria. 1 (1977) 27-32.
https://doi.org/10.1016/0378-3812(77)80023-X
T / K =	288.15				Chart (double-click image to zoom in)
P / bar	x₁	y₁
38.594	0.085	0.1379
40.479	0.1202	0.1836
41.695	0.1473	0.2153
45.272	0.2227	0.298
46.671	0.2552	0.3317
48.656	0.3201	0.3897
54.867	0.5596	0.5858
55.901	0.6172	0.6333
56.357	0.6846	0.6888
56.337	0.6977	0.6967
56.317	0.7367	0.7367	AZEO
56.317	0.7403	0.7379
56.306	0.7711	0.7508
56.022	0.8351	0.8105
54.867	0.8965	0.8708
53.004	0.9591	0.9426
Property change of mixing data
Enthalpy of mixing
Wallis, Kevin P - Clancy, Paulette - Zollweg, John A - Streett, William B, Excess thermodynamic properties for {xCO2 + (1 − x)C2H6} (I): experiment and theory, The Journal of Chemical Thermodynamics. 16 (1984) 811-823.
https://doi.org/10.1016/0021-9614(84)90028-4
T / K =	217				Chart (double-click image to zoom in)
P / bar =	UNKNOWN (10.5067)
hᴹ / J.mol⁻¹	x₁
1019.6	0.8029
1345.7	0.6975
1422.6	0.6118
1464.4	0.5367
1363	0.4116
1322.1	0.3574
1164.5	0.2889
Wormald, C.J - Eyears, J.M, Excess molar enthalpies and excess molar volumes of {xCO2 + (1 − x)C2H6} up to 308.4 K and 11.0 MPa, The Journal of Chemical Thermodynamics. 20 (1988) 323-331.
https://doi.org/10.1016/0021-9614(88)90129-2
T / K =	248.1				Chart (double-click image to zoom in)
P / bar =	30
hᴹ / J.mol⁻¹	z₁
519	0.904
1048	0.807
1365	0.709
1514	0.609
1509	0.509
1465	0.459
1301	0.41
671	0.153
Wormald, C.J - Eyears, J.M, Excess molar enthalpies and excess molar volumes of {xCO2 + (1 − x)C2H6} up to 308.4 K and 11.0 MPa, The Journal of Chemical Thermodynamics. 20 (1988) 323-331.
https://doi.org/10.1016/0021-9614(88)90129-2
T / K =	272.1				Chart (double-click image to zoom in)
P / bar =	45
hᴹ / J.mol⁻¹	z₁
194	0.959
432	0.918
725	0.87
906	0.838
1075	0.796
1416	0.7138
1475	0.673
1595	0.633
1626	0.592
1702	0.525
1670	0.508
1655	0.465
1641	0.425
1519	0.34
1328	0.299
1264	0.256
1055	0.213
792	0.172
429	0.125
137	0.041
Wormald, C.J. - Hodgetts, R.W., Excess enthalpies and volumes for (carbon dioxide + ethane) atT= 291.6 K, close to the minimum in the critical locus, The Journal of Chemical Thermodynamics. 29 (1997) 75-85.
https://doi.org/10.1006/jcht.1996.0141
T / K =	291.6				Chart (double-click image to zoom in)
P / bar =	40
hᴹ / J.mol⁻¹	z₁
235	0.978
462	0.952
942	0.893
1431	0.834
1899	0.775
2339	0.716
2781	0.656
3219	0.597
3607	0.537
4003	0.476
4352	0.417
4656	0.358
4923	0.296
5220	0.237
5424	0.178
5431	0.119
27	0.061
Wormald, C.J. - Hodgetts, R.W., Excess enthalpies and volumes for (carbon dioxide + ethane) atT= 291.6 K, close to the minimum in the critical locus, The Journal of Chemical Thermodynamics. 29 (1997) 75-85.
https://doi.org/10.1006/jcht.1996.0141
T / K =	291.6				Chart (double-click image to zoom in)
P / bar =	54
hᴹ / J.mol⁻¹	z₁
207	0.979
243	0.978
242	0.977
460	0.942
877	0.882
1277	0.823
1624	0.762
1931	0.703
2179	0.644
2379	0.584
2473	0.525
2414	0.464
-346	0.382
-366	0.346
-373	0.287
-274	0.225
-184	0.166
-138	0.107
Wormald, C.J. - Hodgetts, R.W., Excess enthalpies and volumes for (carbon dioxide + ethane) atT= 291.6 K, close to the minimum in the critical locus, The Journal of Chemical Thermodynamics. 29 (1997) 75-85.
https://doi.org/10.1006/jcht.1996.0141
T / K =	291.6				Chart (double-click image to zoom in)
P / bar =	58.5
hᴹ / J.mol⁻¹	z₁
509	0.946
4872	0.869
6123	0.831
6055	0.773
5904	0.715
5530	0.656
4867	0.596
2473	0.506
2264	0.476
1957	0.416
1699	0.357
1431	0.296
1151	0.235
863	0.173
538	0.111
Wormald, C.J. - Hodgetts, R.W., Excess enthalpies and volumes for (carbon dioxide + ethane) atT= 291.6 K, close to the minimum in the critical locus, The Journal of Chemical Thermodynamics. 29 (1997) 75-85.
https://doi.org/10.1006/jcht.1996.0141
T / K =	291.6				Chart (double-click image to zoom in)
P / bar =	31
hᴹ / J.mol⁻¹	z₁
49	0.978
200	0.893
217	0.834
256	0.774
324	0.714
377	0.655
434	0.535
437	0.476
438	0.414
434	0.355
394	0.297
354	0.235
310	0.176
233	0.118
129	0.056
Wormald, C.J - Eyears, J.M, Excess molar enthalpies and excess molar volumes of {xCO2 + (1 − x)C2H6} up to 308.4 K and 11.0 MPa, The Journal of Chemical Thermodynamics. 20 (1988) 323-331.
https://doi.org/10.1016/0021-9614(88)90129-2
T / K =	300.1				Chart (double-click image to zoom in)
P / bar =	40
hᴹ / J.mol⁻¹	z₁
219	0.85
343	0.749
398	0.698
435	0.65
473	0.6
510	0.548
522	0.499
545	0.4
511	0.298
474	0.247
399	0.197
218	0.098
Wormald, C.J - Eyears, J.M, Excess molar enthalpies and excess molar volumes of {xCO2 + (1 − x)C2H6} up to 308.4 K and 11.0 MPa, The Journal of Chemical Thermodynamics. 20 (1988) 323-331.
https://doi.org/10.1016/0021-9614(88)90129-2
T / K =	308.4				Chart (double-click image to zoom in)
P / bar =	40
hᴹ / J.mol⁻¹	z₁
133	0.903
249	0.809
340	0.711
402	0.616
433	0.512
436	0.313
356	0.21
236	0.106
Wormald, C.J - Eyears, J.M, Excess molar enthalpies and excess molar volumes of {xCO2 + (1 − x)C2H6} up to 308.4 K and 11.0 MPa, The Journal of Chemical Thermodynamics. 20 (1988) 323-331.
https://doi.org/10.1016/0021-9614(88)90129-2
T / K =	308.4				Chart (double-click image to zoom in)
P / bar =	65
hᴹ / J.mol⁻¹	z₁
424	0.917
685	0.886
670	0.868
1156	0.772
1503	0.722
1559	0.673
1740	0.622
1794	0.572
2014	0.568
2008	0.519
2016	0.519
2046	0.519
2201	0.473
2160	0.424
2156	0.374
1998	0.294
1680	0.243
659	0.148
317	0.098
Wormald, C.J - Eyears, J.M, Excess molar enthalpies and excess molar volumes of {xCO2 + (1 − x)C2H6} up to 308.4 K and 11.0 MPa, The Journal of Chemical Thermodynamics. 20 (1988) 323-331.
https://doi.org/10.1016/0021-9614(88)90129-2
T / K =	308.4				Chart (double-click image to zoom in)
P / bar =	83
hᴹ / J.mol⁻¹	z₁
1684	0.898
2039	0.847
2354	0.748
2418	0.697
2365	0.669
2280	0.595
2159	0.546
2010	0.495
1861	0.446
1401	0.342
1266	0.294
1053	0.242
897	0.196
685	0.148
440	0.098
204	0.046
Wormald, C.J - Eyears, J.M, Excess molar enthalpies and excess molar volumes of {xCO2 + (1 − x)C2H6} up to 308.4 K and 11.0 MPa, The Journal of Chemical Thermodynamics. 20 (1988) 323-331.
https://doi.org/10.1016/0021-9614(88)90129-2
T / K =	308.4				Chart (double-click image to zoom in)
P / bar =	110
hᴹ / J.mol⁻¹	z₁
527	0.898
1121	0.795
1355	0.694
1454	0.643
1454	0.618
1478	0.593
1476	0.57
1470	0.543
1465	0.52
1438	0.495
1404	0.486
1397	0.445
1307	0.392
1061	0.292
759	0.193
393	0.095
Additional data with unitary variance
Critical point					Chart (double-click image to zoom in)
Khazanova, N.E. - Sominskaya, E.E. - Zakharova, A.V. - Rozovski, M.B., Thermodynamic properties of the ethane-​carbon dioxide system and the pressure-​volume-​temperature-​normality data, Teplofiz. Svoistva Veshchestv Mater. 10 (1976) 213-219.
T / K	P / bar	x₁
290.7	58.161	0.569
291.59	60.592	0.679
292.45	54.513	0.396
292.72	62.284	0.736
292.95	62.386	0.745
293.19	62.872	0.754
294.77	64.747	0.805
295.03	65.253	0.813
299	68.901	0.906
303.19	50.663	0.15
Khazanova, N.E. - Lesnevskaya, L.S. - Zakharova, A.V., Liquid-​vapor equilibrium in the ethane-​CO2 system, Khim. Promst. Moscow. 44 (1966) 364-365.
T / K	P / bar	x₁
290.75	58.262	0.573
290.95	58.971	0.6
291.35	56.539	0.5
292.75	55.019	0.4
295.25	65.557	0.8
295.45	53.398	0.3
297.75	51.878	0.2
299.05	69.408	0.9
301.45	50.359	0.1
Ohgaki, Kazunari - Katayama, Takashi, Isothermal vapor-liquid equilibrium data for the ethane—carbon dioxide system at high pressures, Fluid Phase Equilibria. 1 (1977) 27-32.
https://doi.org/10.1016/0378-3812(77)80023-X
T / K	P / bar	x₁
290.96	58.596	0.5767
290.97	60.106	0.6222
291.6	61.281	0.6871
292.04	63.207	0.7372
293.15	55.293	0.3735
295.9	66.165	0.8202
Gil, Laura - Otín, Santos F. - Embid, Jose Muñoz - Gallardo, M. Asunción - Blanco, Sofía - Artal, Manuela - Velasco, Inmaculada, Experimental setup to measure critical properties of pure and binary mixtures and their densities at different pressures and temperatures, The Journal of Supercritical Fluids. 44 (2008) 123-138.
https://doi.org/10.1016/j.supflu.2007.11.003
T / K	P / bar	x₁
291	57.02	0.5016
291.08	57.76	0.5517
291.09	59.49	0.5988
291.63	60.22	0.6493
291.9	56.34	0.4484
292.31	61.54	0.6991
293.25	54.95	0.3493
293.65	63.35	0.7526
295.18	54.37	0.3006
295.83	53.83	0.2546
296.12	66.32	0.8019
298.15	68.19	0.8688
298.56	52.85	0.2008
299.12	52.06	0.154
299.15	69.12	0.8988
301.8	71.62	0.9495
301.84	51.08	0.1005
304.01	50.01	0.0305
Horstmann, Sven - Fischer, Kai - Gmehling, Jürgen - Kolář, Petr, Experimental determination of the critical line for (carbon dioxide + ethane) and calculation of various thermodynamic properties for (carbon dioxide +n-alkane) using the PSRK model, The Journal of Chemical Thermodynamics. 32 (2000) 451-464.
https://doi.org/10.1006/jcht.2000.0611
T / K	P / bar	x₁
291.04	57.87	0.5605
291.48	60.26	0.6601
291.8	56.44	0.4607
293.66	54.85	0.3548
293.71	63.58	0.7657
296.82	53.52	0.2403
298.16	68.31	0.8805
300.7	51.62	0.1223
Goodwin, Anthony R.H. - Moldover, Michael R., Phase border and density determinations in the critical region of (carbon dioxide+ethane) determined from dielectric permittivity measurements, The Journal of Chemical Thermodynamics. 29 (1997) 1481-1494.
https://doi.org/10.1006/jcht.1997.0257
T / K	P / bar	x₁
291.13	56.84	0.4924
292.98	62.783	0.7398
296.51	53.474	0.2517
Morrison, G. - Kincaid, J. M., Critical point measurements on nearly polydisperse fluids, AIChE Journal. 30 (1984) 257-262.
https://doi.org/10.1002/aic.690300213
T / K	P / bar	x₁
298.92	69.35	0.9025
302.66	72.5	0.9739

[truncated: 15 more sheets: 909_3, 909_5, 909_56, 909_104, 909_502, 909_2082, 1051_11, 1051_137, 1051_501, 1052_501, 1313_502, 1405_17, 1405_502, 1427_17, 1501_1421]
